# Supplementary material
Source: Elsevier journal article supplement (https://www.sciencedirect.com/science/article/pii/S0014256522000121)
Supplement: mmc1 [file S0014256522000121:mmc1.pdf]

## CONSENSO

**Guías de práctica clínica en la osteoporosis posmenopáusica, glucocorticoidea y del varón (actualización 2021) de la Sociedad Española de Investigación Ósea y del Metabolismo Mineral (SEIOMM)**

**Executive summary clinical practice guideline of postmenopausal, glucocorticoid-induced and male osteoporosis (2022 update). Spanish Society for Bone and Mineral Metabolism Investigation (SEIOMM)**

**José A. Riancho<sup>1</sup>, Pilar Peris<sup>2</sup>, Jesús González-Macías<sup>3</sup> y José L. Pérez-Castrillón<sup>4</sup>, en nombre de la Comisión de Redacción de las Guías de Osteoporosis de la SEIOMM\***

<sup>1</sup>Servicio de Medicina Interna, Hospital Universitario Marqués de Valdecilla. Departamento de Medicina y Psiquiatría, Universidad de Cantabria, IDIVAL. Santander, España

<sup>2</sup>Servicio de Reumatología, Hospital Clínic. Universidad de Barcelona, IDIBAPS, CIBERehd. Barcelona, España

<sup>3</sup>Departamento de Medicina y Psiquiatría, Universidad de Cantabria, IDIVAL, Santander, España

<sup>4</sup>Servicio de Medicina Interna, Hospital Universitario Río Hortega. Departamento de Medicina, Universidad de Valladolid. Valladolid, España

(\*) El listado con los nombres de la Comisión de Redacción están en el anexo I.

Autor de correspondencia: [rianchoj@unican.es](mailto:rianchoj@unican.es) (J.A. Riancho).

## **Resumen**

Esta versión actualizada de las guías de osteoporosis de la SEIOMM (Sociedad Española de Investigación en Osteoporosis y Metabolismo Mineral) incorpora la información más relevante publicada en los últimos 7 años, desde las guías de 2015, con estudios de imagen, como la valoración de la fractura vertebral y el análisis del índice trabecular óseo. Además, los avances terapéuticos incluyen los nuevos fármacos anabólicos, los estudios comparativos de la eficacia de los fármacos y la terapia secuencial y combinada. Por ello se actualizan también las recomendaciones de los tratamientos.

## **Palabras clave**

Osteoporosis;  
Fracturas;  
Densitometría;  
Anabólicos;  
Antirresortivos

## **Summary**

This updated version of the SEIOMM (Spanish Society for Research in Osteoporosis and Mineral Metabolism) osteoporosis guides incorporates the most relevant information published in the last 7 years, since the 2015 guides, with imaging studies, such as vertebral fracture assessment and bone trabecular score analysis. In addition, therapeutic advances include new anabolic agents, comparative studies of drug efficacy, and sequential and combined therapy. Therefore, therapeutic algorithms are also updated.

## **Key words**

Osteoporosis;  
Fractures;  
Densitometry;  
Anabolic agents;  
Antiresorptive drugs

## Introducción

Han transcurrido 7 años desde que se elaboró la última versión de las Guías de Osteoporosis de la Sociedad Española de Investigación Ósea y Metabolismo Mineral (SEIOMM), de acuerdo a la metodología estándar de la medicina basada en la evidencia (1). La presente actualización de las guías incorpora la información más importante aparecida desde la publicación de la versión anterior, especialmente en cuanto a procedimientos diagnósticos y opciones terapéuticas. Entre los primeros, merece la pena destacar la incorporación del índice trabecular óseo (TBS, *Trabecular Bone Score*) y la detección de fracturas vertebrales por densitometría. Entre los tratamientos, se incluyen los nuevos fármacos anabólicos (abaloparatida y romosozumab) y se consideran los estudios comparativos de la eficacia de varios fármacos en la osteoporosis grave. Asimismo, se valoran las pautas de actuación tras la suspensión de los antirresortivos y otros esquemas de tratamiento secuencial y combinado.

Para la elaboración de la actualización, un grupo de expertos (ver anexo I) revisó cada una de las secciones para incorporar las novedades aparecidas en los últimos años. Posteriormente, el borrador inicial fue examinado críticamente por el conjunto de expertos. Una vez considerados sus comentarios, el nuevo texto se puso a disposición de otros entes interesados (incluyendo socios de SEIOMM, asociaciones de pacientes, Agencia Española de Medicamentos y Productos Sanitarios e industrias farmacéuticas) para que pudieran hacer aportaciones al documento, que fue después analizado de nuevo por el grupo de expertos redactor de las guías. Las recomendaciones se gradúan de acuerdo al nivel de evidencia según se señala en las tablas S1 y S2 (ver anexo II).

Se analizan primero los aspectos diagnósticos y terapéuticos de la osteoporosis primaria de las mujeres posmenopáusicas. Después, se revisan los aspectos específicos de la osteoporosis del varón y la osteoporosis inducida por glucocorticoides.

## EVALUACIÓN DE LAS PACIENTES EN RIESGO DE OSTEOPOROSIS

### 1. Factores de riesgo de fractura

Existen numerosos factores relacionados con el riesgo de fracturas óseas. Los principales son el sexo, la edad, la densidad mineral ósea (DMO), el antecedente personal de fractura por fragilidad, el antecedente de fractura de cadera en un familiar de primer grado y el peso corporal bajo (índice de masa corporal [IMC]  $< 20 \text{ kg/m}^2$ ). Paradójicamente, la obesidad puede ser factor de riesgo para algunas fracturas periféricas, como las de húmero y tercio distal de radio. Factores de riesgo reconocidos son, además, diversas enfermedades y tratamientos (2,3) (hipogonadismo, menopausia precoz, amenorrea prolongada, anorexia nerviosa, malabsorción, artritis reumatoide, diabetes —en particular la tipo 1—, inmovilización, y los tratamientos con glucocorticoides, inhibidores de la aromatasa o agonistas de las hormonas liberadoras de gonadotropinas). Otras enfermedades y medicamentos que pueden estar asociados con el desarrollo de osteoporosis, aunque probablemente con menos fuerza, son el hiperparatiroidismo, el hipertiroidismo, los inhibidores selectivos de la recaptación de serotonina, los inhibidores de la bomba de protones y los anticonvulsivantes, así como el tabaquismo y el consumo excesivo de alcohol. El déficit de calcio y el déficit de vitamina D se han considerado tradicionalmente factores de riesgo de osteoporosis, aunque su peso exacto continúa discutiéndose (tabla 1).

Los factores asociados a un mayor riesgo de caídas (como la inestabilidad postural, la incapacidad para levantarse de una silla, el déficit visual y algunos problemas neurológicos) se asocian también, consecuentemente, a un mayor riesgo de fracturas.

Tras sufrir una primera fractura, el mayor riesgo de sufrir una nueva fractura se da en los dos primeros años, sobre todo si la primera fractura fue vertebral (4–6). Esto ha llevado a formular el concepto de «riesgo inminente» de fractura. Los principales factores de riesgo que se han asociado a riesgo inminente son: la edad avanzada, el género femenino, la raza blanca, la fractura reciente, las caídas y algunas comorbilidades y tratamientos (como masa ósea muy baja, enfermedad cardiovascular, enfermedad pulmonar obstructiva crónica y depresión, ansiedad, sedantes, hipnóticos, glucocorticoides y relajantes musculares).

En conclusión, la valoración de factores de riesgo clínicos combinada con la medición de la DMO es un método eficaz de valoración del riesgo de fractura (recomendación A).

## 2. Densitometría ósea y técnicas afines

De entre las diversas técnicas disponibles, la absorciometría por rayos X con doble nivel de energía X (DXA), que cuantifica la DMO, es el procedimiento habitualmente utilizado para estimar el riesgo de fractura (7). Los resultados se expresan en términos de índice T (o *T-score*), o número de desviaciones estándar (DE) en que el valor de DMO difiere del de la población adulta joven (20-29 años) normal. La OMS ha establecido que el diagnóstico de osteoporosis se haga cuando la DMO sea  $\leq -2,5$  T (8). Más tarde la propia OMS matizó que dicho valor debe corresponder a una medición realizada en cuello de fémur y utilizando como referencia el estudio NHANES III (9). La Sociedad Internacional de Densitometría Clínica (ISCD) (10), sin embargo, considera que el diagnóstico puede establecerse cuando dicho valor de  $-2,5$  T se encuentra en cualquiera de las tres siguientes localizaciones: columna lumbar, cadera total o cuello femoral. La OMS definió además las situaciones de normalidad, osteopenia (o masa ósea baja) y osteoporosis establecida o grave (tabla 2).

De forma alternativa, se puede usar la DMO medida en el tercio medio del radio para diagnosticar osteoporosis cuando la cadera y la columna lumbar no se puedan utilizar o interpretar (11).

En mujeres premenopáusicas, hombres menores de 50 años y niños, la ISCD recomienda que, en lugar de puntuaciones T, se utilicen puntuaciones Z ajustadas por etnia o raza, con puntuaciones  $Z \leq -2,0$  como «baja densidad mineral ósea para la edad cronológica» o «por debajo del rango esperado para la edad» y aquellas  $>-2,0$  como «dentro del rango esperado para la edad».

La evaluación de la eficacia terapéutica es una indicación para densitometría, que puede repetirse tras 2-3 años de tratamiento en general.

Otras técnicas de medición (ultrasonometría cuantitativa, tomografía computarizada cuantitativa, etc.) también proporcionan valores que guardan relación con el riesgo de fractura, pero no se recomiendan como procedimientos diagnósticos.

La DXA en proyección lateral puede utilizarse para identificar la presencia de fracturas vertebrales (VFA, *vertebral fracture assessment*), aunque su exactitud es menor que la de la

radiografía convencional, especialmente en la identificación de fracturas en las vértebras dorsales altas.

El TBS es un parámetro de textura ósea que se obtiene a partir de la imagen de la DXA de columna lumbar. El TBS está disminuido en pacientes con fracturas por fragilidad y es útil, independiente de la DMO, en la valoración del riesgo de fractura en mujeres y hombres mayores de 50 años. La predicción del riesgo de fractura es mejor con la combinación de DMO y TBS, que midiendo solo la DMO. Puede ser especialmente útil para evaluar el riesgo de fractura en sujetos que padecen diabetes o hiperparatiroidismo primario y en los tratados con glucocorticoides. El TBS se expresa también en términos absolutos y como índice-T (*T-score*). Un valor de TBS  $<1,230$  ( $T < -3$ ) es indicativo de una microestructura trabecular degradada y riesgo elevado de fractura. El TBS se ha incluido en la herramienta de cálculo de riesgo absoluto de fractura denominada Fracture Risk Assessment Tool (FRAX).

A pesar de la utilidad demostrada de la DXA en la valoración de los pacientes en riesgo de fractura, hay que tener presente que su sensibilidad y especificidad son limitadas. No identifica a todos los sujetos en riesgo de fractura y más del 50% de las fracturas periféricas ocurren en pacientes con una puntuación  $T > -2,5$  (12,13). La tendencia actual es considerar la medición de DMO como un factor de riesgo más, utilizándolo junto con los factores de riesgo clínicos presentes para calcular el riesgo absoluto de fractura (14,15).

No existen criterios universalmente aceptados respecto a cuándo realizar una densitometría. La recomendación general es que se realice cuando existen factores de riesgo que se asocian fuertemente con osteoporosis o fracturas (tabla 1). Entre ellos:

- a) Trastornos frecuentemente asociados con osteoporosis: artritis reumatoide, menopausia precoz, hiperparatiroidismo, hipertiroidismo, malabsorción, anorexia nerviosa, etc.
- b) Tratamientos con efectos negativos sobre el hueso: glucocorticoides, antiestrógenos, antiandrógenos, etc.
- c) Otros factores (especialmente si coinciden dos de ellos): edad superior a 65 años (según algunos autores), bajo peso ( $IMC < 20 \text{ kg/m}^2$ ), historia familiar de osteoporosis, alcoholismo, tabaquismo, etc.

En conclusión, la medición de la DMO en fémur proximal y columna lumbar mediante DXA es una prueba útil en la valoración del riesgo de fractura (recomendación A). El TBS puede aportar información adicional sobre el riesgo de fracturas (recomendación B)

### 3. Marcadores del recambio óseo

Los marcadores del recambio óseo (MRO) proporcionan información sobre la dinámica del recambio óseo. Entre los marcadores de formación ósea destacan la osteocalcina, la fosfatasa alcalina ósea y los propéptidos carboxi y aminoterminal del procolágeno tipo I (PICP y PINP) y entre los de resorción, los telopéptidos carboxi y aminoterminal del colágeno I (CTX en sangre, s-CTX, y orina, y NTX en orina) y la fosfatasa ácida tartrato-resistente 5b (FATR 5b). Diversas organizaciones internacionales (International Federation of Clinical Chemistry) han

recomendado el uso del P1NP (formación) y del s-CTX (resorción) en los estudios clínicos. Es importante controlar su variabilidad preanalítica obteniendo la muestra biológica entre las 8 y 10 de la mañana, tras una noche en ayunas.

Los MRO no son útiles para el diagnóstico de osteoporosis, pero pueden contribuir a identificar, junto a otros factores de riesgo, las pacientes con mayor riesgo de fractura. Son especialmente útiles para valorar de forma precoz la respuesta al tratamiento, tanto antirresortivo como anabólico (evidencia 2a) (16,17). Se recomienda la medición de s-CTX y PINP para monitorizar el recambio tras la suspensión del denosumab (18).

En conclusión, los MRO son útiles para evaluar la respuesta terapéutica (recomendación B), pero han de medirse en condiciones estandarizadas. No son necesarios de manera sistemática en el diagnóstico de la osteoporosis.

#### **4. Identificación de fracturas vertebrales**

La radiografía convencional no es un método sensible ni específico para valorar los cambios de masa ósea (8). En cambio, resulta imprescindible para identificar las fracturas. En el caso de las vertebrales, su diagnóstico exige un descenso de al menos un 20-25% de altura (19). Los descensos ligeros pueden confundirse con deformidades de otro origen (secuelas de enfermedad de Scheuermann, pequeños acúñamientos de tipo degenerativo) (20). La VFA mediante DXA puede ser útil como un primer paso para la detección de fracturas. Se recomienda realizar una radiografía (o VFA) en pacientes con sospecha de osteoporosis que presentan alguna de estas características: dolor de espalda, edad mayor de 70 años, tratamiento con glucocorticoides o disminución significativa de talla (>4 cm en talla histórica o >2 cm en talla constatada) (21).

En conclusión, la identificación de las fracturas vertebrales tiene gran importancia en la toma de decisiones, dado que constituyen un factor de riesgo de futuras fracturas. La evaluación puede realizarse mediante radiografía o mediante VFA. La radiografía no debe utilizarse como método de valoración de la masa ósea para el diagnóstico de la osteoporosis (recomendación A).

#### **5. Protocolo de estudio**

Además de la anamnesis y exploración física, el estudio de los pacientes con osteoporosis debe incluir un hemograma y una determinación de los parámetros bioquímicos elementales (función renal y hepática, calcio, albúmina, fósforo, fosfatasa alcalina, tirotropina (TSH), 25-hidroxivitamina D y un proteinograma). Es útil cuantificar la calciuria. Estos parámetros deben determinarse antes de iniciar tratamiento y después repetirse en caso de indicación clínica. Se discute la conveniencia de determinar la PTH y los marcadores de recambio óseo (ver sección previa). Casi siempre serán necesarias una densitometría y una valoración de posibles fracturas vertebrales, mediante VFA o radiología. En pacientes jóvenes y cuando se sospechan enfermedades concretas deben realizarse los estudios pertinentes para descartar causas secundarias de osteoporosis (hipercortisolismo, celiaquía, mastocitosis sistémica, etc.) (recomendación C).

## **6. Herramientas de predicción de riesgo**

Se han elaborado diversas escalas de puntuación para valorar bien el riesgo de padecer osteoporosis (DXA baja), o bien el de padecer fracturas osteoporóticas. Las escalas de puntuación para valorar el riesgo de padecer osteoporosis densitométrica no incluyen la DMO, y son útiles para decidir cuándo debe realizarse una densitometría. La capacidad para predecir una DMO baja es similar en todas ellas. La más sencilla (Osteoporosis Self-assessment Tool [OST]) (22,23) incluye únicamente la edad y el peso, factores que están presentes en todas las demás.

Para valorar el riesgo de fracturas, la combinación de los datos clínicos con la DXA mejora la sensibilidad de la predicción. Se han elaborado varios instrumentos a tal fin, como el FRAX (24), la escala del Garvan Medical Research Institute (25) y el QFracture Index (26). Los tres tienen una capacidad discriminatoria similar, y son de un rendimiento solo moderado (27,28). El FRAX es el más extendido a nivel mundial. Lamentablemente, la adaptación de este último a España ha sido inadecuada (29) e infraestima el riesgo de fractura, sobre todo de fracturas osteoporóticas mayores. En la actualidad se encuentran en fase de validación algunas herramientas, como EPIC, ajustadas a la población española.

En conclusión, si bien las herramientas de predicción del riesgo de fractura podrían ayudar a la toma de decisiones en algunos pacientes, su valor predictivo en nuestra población es limitado. Las adaptaciones de FRAX pueden ser utilizadas con cautela, a la espera de nuevos procedimientos más exactos (Recomendación C).

## **TRATAMIENTOS DISPONIBLES PARA LA OSTEOPOROSIS POSMENOPAUSICA**

### **1. Intervenciones no farmacológicas**

Se debe mantener una dieta equilibrada, con un aporte de proteínas de 1-1,5 g/kg. La exposición solar es necesaria para la síntesis de vitamina D, pero a menudo se necesitarán suplementos adicionales (ver más adelante) (30). Existe evidencia de que el ejercicio físico que supone carga sobre el esqueleto tiene un efecto positivo en la prevención de caídas y en la reducción del riesgo de fractura (31), por lo que es recomendable la práctica regular de este tipo de ejercicio, como podría ser caminar cada día al menos 30 minutos.

Deben evitarse el tabaquismo y el consumo excesivo de alcohol, pues ambos son factores asociados a disminución de masa ósea y fracturas (32,33).

Aunque la eficacia de los programas de prevención de caídas (más allá del ejercicio físico) es controvertida, sí que parecen útiles en pacientes de edad avanzada institucionalizados y con caídas de repetición (34,35).

Los protectores de cadera parecen reducir ligeramente el riesgo de fractura de cadera. Sin embargo, la mala tolerancia por parte de algunos pacientes, la pobre adherencia y el ligero incremento del riesgo de fracturas pélvicas, limitan su aplicación (36).

### **2. Calcio y vitamina D**

Las pacientes tratadas con fármacos para la osteoporosis (antirresortivos o anabólicos) deben recibir un aporte adecuado de calcio y vitamina D (37,38). Los niveles séricos de 25-hidroxivitamina D (25OHD) deben situarse por encima de 20-25 ng/ml, y preferiblemente por

encima de 30 ng/ml (39). La dosis diaria de vitamina D recomendada generalmente es de unas 800-1200 UI/d, aunque algunas pacientes pueden necesitar dosis mayores para mantener niveles adecuados de 25OHD. También puede administrarse su equivalente quincenal o mensual, pero no se recomienda la administración de grandes cantidades de vitamina D en dosis única (p. ej., 500.000 UI/año) (40). En el caso de utilizar calcifediol (25OHD), la dosis habitual es de 0,266 microgramos cada 15-30 días. Puede ser preferible a la vitamina D en pacientes con hepatopatía avanzada o con problemas de absorción intestinal. Ocasionalmente, esos pacientes pueden requerir la administración parenteral.

En cuanto al calcio, la ingesta diaria debe ser de 1000-1200 mg/día (30). Se considera preferible conseguir dicha cantidad mediante la dieta, pero si con esta no se alcanza, deben añadirse suplementos. Es importante que la población general, en particular los individuos de edad avanzada, mantengan un aporte de nutrientes adecuado, incluyendo calcio y vitamina D. Sin embargo, el efecto aislado del calcio y la vitamina D sobre la osteoporosis es controvertido, pero, de existir, parece limitado (41-43).

En conclusión, las pacientes en riesgo de osteoporosis y las tratadas con fármacos antirresortivos o anabólicos deben recibir un aporte adecuado de calcio y vitamina D, pero en general estos son por sí mismos insuficientes como tratamiento de la osteoporosis (recomendación A).

### 3. Calcitonina

Aunque puede disminuir ligeramente el riesgo de fracturas vertebrales, la ausencia de efecto sobre fracturas periféricas y un aumento del riesgo de tumores con el tratamiento a largo plazo han llevado a descartar su uso como tratamiento de la osteoporosis (44,45).

### 4. Tiazidas

Aunque diversos estudios observacionales sugieren que el tratamiento con tiazidas se asocia a una mayor masa ósea y una reducción del riesgo de fractura (46), no disponemos de datos que permitan recomendar su uso en el tratamiento de la osteoporosis. Puede considerarse su utilización (p. ej., 12-50 mg/d de hidroclorotiazida o clortalidona) en pacientes con hipercalciuria (47) (Recomendación D).

### 5. Terapia estrogénica

Varios ensayos clínicos han demostrado la eficacia antifracturaria de los estrógenos. Un metaanálisis en red reciente (*network meta-analysis*) muestra que la terapia estrogénica (con o sin progesterona) reduce un 34% el riesgo de fractura vertebral (HR 0,66; IC95% 0,49-0,89); un 29% el de fractura de cadera (HR 0,71; 95% IC 0,52-0,98); y un 21% el de fracturas no vertebrales (HR 0,79; IC95% 0,70- 0,90) (48). Sin embargo, los efectos secundarios (aumento de eventos cardiovasculares y cáncer de mama) puestos de manifiesto en el estudio WHI y otros ensayos, han determinado que no se recomienda en el tratamiento de la osteoporosis, salvo en mujeres con menopausia precoz o alto riesgo de fractura para las que no se disponga de otra opción terapéutica (49). En enfermas con osteoporosis que reciben estrógenos por presentar un síndrome climatérico, pueden considerarse adecuados para el tratamiento del trastorno óseo.



En conclusión, aunque la terapia estrogénica es eficaz en la prevención de fracturas osteoporóticas, la posibilidad de efectos secundarios graves no la hace recomendable como tratamiento de la osteoporosis posmenopáusica (recomendación A), salvo que se trate de una menopausia precoz sin contraindicaciones o no se disponga de ninguna otra opción terapéutica (recomendación D).

## **6. Moduladores selectivos de los receptores estrogénicos**

Varios estudios demuestran que estos fármacos aumentan la DMO en columna, con períodos de seguimiento hasta 8 años (50,51). Un metaanálisis reciente mostró que el raloxifeno y el bazedoxifeno reducen el riesgo de fractura vertebral en un 40%, pero no influyen en las no vertebrales (48). Su principal complicación es un aumento del riesgo de enfermedad tromboembólica venosa.

En conclusión, los moduladores selectivos de los receptores estrogénicos (SERM) pueden estar indicados en el tratamiento de osteoporosis por reducir las fracturas vertebrales, pero no reducen el riesgo de las no vertebrales (recomendación A).

## **7. Tibolona**

Aunque reduce el riesgo de fracturas vertebrales y no vertebrales en mujeres menores de 60 años (o menos de 10 años de duración de menopausia) (52,53), los efectos secundarios cardiovasculares condicionan su empleo como tratamiento de la osteoporosis y limitan su uso a pacientes sin alto riesgo cardiovascular o cáncer de mama en las que no sean apropiados otros fármacos (recomendación B). La indicación en osteoporosis no está aprobada en España.

## **8. Fitoestrógenos e isoflavonas**

Las isoflavonas pueden tener un efecto favorable sobre la DMO (54), pero la ausencia de datos sobre su eficacia en fracturas hace que no se recomienden para el tratamiento de la osteoporosis.

## **9. Bisfosfonatos**

### **9.1. Etidronato**

Reduce las fracturas vertebrales en torno a un 40% (55), pero no las no vertebrales (evidencia 1a) (recomendación A). Ha caído en desuso al disponerse de bisfosfonatos (BP) más eficaces.

### **9.2. Alendronato**

El alendronato ha demostrado que aumenta la DMO a nivel de la columna lumbar y de la cadera tanto en estudios de tratamiento como de prevención de mujeres osteoporóticas (evidencia 1a). Este efecto se ha observado tanto con la administración diaria como con la semanal, mostrando ambas una eficacia similar (evidencia 1a). A la dosis de 70 mg/semana reduce las fracturas vertebrales, las no vertebrales y las de cadera en torno a un 45%, un 25-30% y un 45-55% respectivamente (56,57) (evidencia 1a). La mayor parte de los ensayos clínicos han incluido un

período de tratamiento de 3-5 años. No obstante, a veces puede ser recomendable una administración más prolongada. De hecho, en un estudio de extensión, las pacientes a las que se retiró el tratamiento tras 5 años, tenían mayor riesgo de sufrir fracturas vertebrales clínicas que las que continuaban con él (58). A mayor edad y menor DMO en cuello de fémur en el momento de retirar el tratamiento, mayor es el riesgo de fractura, incluida la no vertebral (59,60). Varios metaanálisis y estudios con datos de práctica real han mostrado datos de eficacia similares a los previos (48,61). El alendronato suele ser bien tolerado, aunque puede presentar efectos secundarios que se describen más adelante. Su empleo a largo plazo se asocia a un incremento de fracturas atípicas. Recientemente se ha especulado sobre un posible efecto beneficioso a nivel cardiovascular (62).

En conclusión, por reducir tanto las fracturas vertebrales como las no vertebrales y las de cadera, tiene un papel definido en el tratamiento de la osteoporosis (recomendación A).

### 9.3. Risedronato

La eficacia del risedronato en prevención de fracturas vertebrales, no vertebrales y de cadera en mujeres posmenopáusicas con osteoporosis u osteopenia ha sido revisada recientemente en una revisión sistemática y metaanálisis en red. La reducción del riesgo de fractura frente a placebo fue del 39% para la fractura vertebral, 27% para fractura de cadera y 22% para fracturas no vertebrales (48,63)(evidencia 1a). Se puede administrar a dosis de 35 mg semanales o 75 mg dos días consecutivos al mes (64,65). Existe una formulación semanal retardada gastrorresistente que no precisa la administración en ayunas (64). El risedronato es bien tolerado, presentando efectos secundarios similares a otros BP que se describen más adelante.

En conclusión, por reducir tanto las fracturas vertebrales como las no vertebrales y las de cadera, tiene un papel definido en el tratamiento de la osteoporosis (recomendación A).

### 9.4 Ibandronato

Puede administrarse por vía oral una vez al mes (150 mg) o cada 3 meses por vía intravenosa (3 mg, no comercializado en España). Disminuye el riesgo de fractura vertebral en torno a un 60%. No disminuye las no vertebrales (evidencia 1b). En un metaanálisis que incluyó 107 ensayos sobre fármacos para la osteoporosis se observó que el ibandronato tenía menor eficacia antifracturaria que otros BP (48).

En conclusión, el ibandronato disminuye el riesgo de fracturas vertebrales (recomendación A), sin efecto demostrado sobre las no vertebrales.

### 9.5. Zoledronato

Se administra por vía intravenosa, A la dosis de 5 mg/año disminuye las fracturas vertebrales, las no vertebrales y la de cadera en un 70%, 25% y 40% respectivamente (66) (evidencia 1b). Las pacientes que tras 3 años de tratamiento lo continúan durante otros 3 años, experimentan una reducción adicional del 50% en el riesgo de fractura vertebral, en comparación con las que lo interrumpen. (67). En un ensayo clínico que incluyó mujeres con «osteopenia» mayores de 65 años se observó que la administración cada 18 meses reducía también las fracturas vertebrales y

no vertebrales (68). Sus efectos secundarios se describen en el apartado siguiente. Un metaanálisis en red no encontró diferencias entre los BP estudiados en cuanto a la prevención de fracturas (69), mientras en otros dos el zoledronato se mostró más eficaz que otros BP (70,71).

En conclusión, por reducir tanto las fracturas vertebrales como las no vertebrales y las de cadera, tiene un papel definido en el tratamiento de la osteoporosis (recomendación A).

## **9.6. Efectos adversos de los bisfosfonatos (72,73)**

Los BP son fármacos seguros y generalmente bien tolerados. No obstante, dado su papel central en el tratamiento de la osteoporosis, se comentan a continuación con detalle los posibles efectos adversos. Hay que tener presente que también se han descritos efectos beneficiosos a nivel extraesquelético, incluyendo una disminución de la mortalidad, en especial la mortalidad por eventos cardiovasculares, y la incidencia de algunos cánceres, si bien la dimensión real de estos efectos es controvertida (74–76).

a) Efectos adversos sobre el tracto digestivo superior. Se han descrito con los BP orales (esofagitis y úlceras esofágicas...) y pueden evitarse en gran medida si el fármaco se ingiere de forma adecuada (con un vaso de agua y manteniéndose la paciente en posición erguida los 30-60 minutos siguientes). En contra de lo sugerido en algunos estudios iniciales, no se ha confirmado que aumenten la incidencia de cáncer de esófago o estómago (77,78). No obstante, deben evitarse en enfermos con procesos del tracto digestivo superior (en particular con dificultad para la deglución o esófago de Barret).

b) Reacción de fase aguda o cuadro pseudogripal. Descrita fundamentalmente con los BP intravenosos, aparece en las 24-36 horas siguientes a la administración del fármaco, se alivia con paracetamol y habitualmente desaparece en tres días (79). Se da en un 25-35% de los enfermos que reciben zoledronato por primera vez. La intensidad es menor tras las inyecciones sucesivas.

c) Fibrilación auricular. Los estudios respecto a la asociación del tratamiento con BP (sobre todo intravenosos) con la fibrilación auricular han arrojado resultados discordantes (80). En todo caso, no parece que deba ser una limitación para el tratamiento cuando estos fármacos están indicados. De hecho, algunos estudios han encontrado una menor tasa de eventos cardiovasculares en pacientes tratados con BP (81,82).

d) Insuficiencia renal. Los BP se desaconsejan en pacientes con filtrado glomerular (FG)  $\leq 30$  mL/min. En pacientes con FG normal los BP intravenosos pueden facilitar el desarrollo de insuficiencia renal si no se administran con precaución. Por eso, deben evitarse la administración demasiado rápida (menos de 15 minutos para el zoledronato) el uso simultáneo de agentes potencialmente nefrotóxicos (AINE, diuréticos) y la utilización en pacientes deshidratados (83,84).

e) Hipocalcemia. Los BP intravenosos pueden producir hipocalcemia clínicamente significativa, especialmente cuando se administran a pacientes con disminución del FG, déficit de vitamina D, aporte de calcio insuficiente o recambio óseo muy alto.

f) Osteonecrosis de maxilares (ONM). El riesgo en pacientes tratadas con BP por osteoporosis es muy bajo (1/1500-1/100.000 pacientes y año, según los estudios) (85,86). Su desarrollo guarda relación con el estado de salud bucal (periodontitis) y el sufrimiento de traumatismos

dentales. Probablemente esté implicada una disminución del recambio óseo. Sin embargo, la medida de los marcadores de recambio no es útil para identificar personas en situación de riesgo. La suspensión temporal del fármaco no ha demostrado disminuir la posibilidad de aparición de esta complicación.

g) Fracturas atípicas de fémur (FAF). Su incidencia es muy baja (87,88). En un estudio reciente en EE. UU. se encontró una frecuencia de 1,7 FAF por cada 10.000 pacientes tratadas con BP. El riesgo relativo, en comparación con las no tratadas, aumentó con el tiempo de exposición a los BP (2,5 con tratamientos durante menos de 3 años; 8,9 con tratamiento durante 3-5 años; 19,9 con 5-8 años de tratamiento y 43,5 con más de 8 años de tratamiento). Aun así, el riesgo absoluto es muy bajo en comparación con el riesgo de fracturas osteoporóticas. De hecho, se ha estimado que por cada fractura atípica que pudiera aparecer durante 3 años de tratamiento, se previenen unas 270 fracturas clínicas por fragilidad, incluyendo 70 fracturas de cadera (89). Entre los factores de riesgo se encuentran la raza asiática, el bajo peso y la geometría del fémur (curvatura en varo). La incidencia de FAF parece disminuir rápidamente tras la retirada del fármaco. La utilidad de la teriparatida en el tratamiento de las FAF es controvertida.

h) Efectos adversos oculares. Con el uso de BP se han descrito diversos tipos de reacciones inflamatorias oculares (epiescleritis, queratitis, uveítis), que son muy poco frecuentes, pero obligan a suspender el tratamiento (90).

i) Dolor osteoarticular y muscular difuso. Es posible un dolor osteoarticular y muscular difuso que desaparece al retirar el fármaco (91).

## 10. Denosumab

Tiene un potente efecto antirresortivo, que se traduce en una disminución del riesgo de fractura. En general, ha demostrado mayor potencia antirresortiva y mayor incremento de DMO que los BP.

Determina reducciones del riesgo de fractura vertebral, no vertebral y de cadera en torno al 70%, 20% y 40% respectivamente (92) (evidencia 1b). Un análisis *post hoc* sugiere que la eficacia en la reducción de fractura de cadera es más evidente en sujetos mayores de 75 años (93) (evidencia 2b). El efecto beneficioso sobre el riesgo de fractura parece mantenerse durante el tratamiento, al menos durante 10 años (94).

En los meses siguientes a la retirada del fármaco se observa un aumento de los marcadores de recambio óseo y una pérdida de la masa ósea ganada con estabilización posterior en valores basales. En algunos pacientes ello se ha asociado a fracturas vertebrales múltiples (95). Por eso, la interrupción del tratamiento con denosumab se debe seguir de la administración de un BP a los seis meses de la última dosis, aunque no se ha establecido cuál es la pauta idónea (ver más adelante) (18).

El denosumab es en general bien tolerado. No se asocia a mayor riesgo de neoplasias, eventos cardiovasculares o infección y es seguro en diabetes (96). Como con los BP, el riesgo de FAF y ONM es muy bajo. En un estudio con pacientes tratados durante un período prolongado de hasta 10 años el riesgo de FAF estuvo en torno a 1/10.000 pacientes-año y el de ONM en 1/2.000 pacientes-año (94). Se puede utilizar en pacientes con filtrado glomerular <30 mL/min, incluso en diálisis, sin necesidad de ajuste de dosis. No obstante, a veces puede aparecer hipocalcemia,

sobre todo en pacientes con insuficiencia renal avanzada, por lo que debe asegurarse un aporte adecuado de calcio y vitamina D y un seguimiento estrecho en este tipo de pacientes.

En conclusión, por reducir tanto las fracturas vertebrales como las no vertebrales y las de cadera, tiene un papel definido en el tratamiento de la osteoporosis (recomendación A).

### **11. Ranelato de estroncio**

Reduce la incidencia de fracturas vertebrales y no vertebrales en torno al 40% y el 16%, respectivamente (97). Incrementa la incidencia de eventos cardiovasculares. En la actualidad no se encuentra comercializado en España ni en otros países europeos.

### **12. PTH 1-34 (teriparatida)**

La teriparatida es el fragmento 1-34 de la paratohormona (PTH). Ejerce un efecto osteoformador. Consigue una reducción del riesgo de fractura vertebral del 65% y de fracturas no vertebrales del 50% (98) (evidencia 1a). No se ha estudiado en ensayos diseñados para valorar su efecto específico en la fractura de cadera. Sin embargo, una revisión de estudios observacionales sugirió una reducción del 56% en fracturas de cadera (99). Más recientemente, un metaanálisis no demostró reducción significativa (48), pero otros 3 concluyeron que reducía las fracturas de cadera entre un 56 y 65% (61,100,101). En un estudio que comparó directamente risedronato y teriparatida en mujeres posmenopáusicas con osteoporosis grave y fracturas vertebrales, el grupo tratado con teriparatida experimentó menos fracturas vertebrales y clínicas que el tratado con el BP (5,4 frente a 12,0%, y 4,8 frente a 9,8%, respectivamente) (102). Se administra en inyección subcutánea diaria durante 2 años. Los beneficios sobre la DMO conseguidos con el fármaco disminuyen progresivamente tras su retirada, por lo que se recomienda un tratamiento secuencial con un antirresortivo. Su tolerancia es buena. Se ha aprobado la comercialización de varios fármacos, biológicos y biosimilares, por cumplir los requisitos habituales de bioequivalencia establecidos para estos fármacos.

En conclusión, la teriparatida reduce las fracturas, tanto vertebrales como no vertebrales y, aunque no tiene aprobada esta indicación, probablemente también reduce las fracturas de cadera (recomendación A).

### **13. PTH (1-84)**

En este momento no cuenta con autorización para ser usada en el tratamiento de la osteoporosis.

### **14. Abaloparatida**

Es un análogo de la región 1-34 del PTHrP (péptido relacionado con la PTH). Un ensayo clínico encontró una reducción del riesgo de fractura vertebral del 86% frente a placebo y del 43% de fracturas no vertebrales (103). Un metaanálisis reciente ha demostrado reducción de un 87% en fractura vertebral, 50% en fractura no vertebral y 61% en fractura de muñeca (104). Está aprobado en EE. UU., pero no en Europa, por lo que no está disponible en España.

## 15. Romosozumab

El romosozumab es un anticuerpo neutralizante de la esclerostina. La esclerostina inhibe la activación de la vía Wnt, esencial en la actividad osteoblástica. Diversos estudios experimentales y clínicos han demostrado que el romosozumab tiene un efecto dual, aumenta la formación, pero también disminuye la resorción ósea. Esto último se ha puesto en relación con una disminución de RANKL. En línea con su efecto dual, aumenta los marcadores de formación, como el PINP, y disminuye los de resorción, como el CTX. El romosozumab induce aumentos notables de la DMO tanto en columna como en cadera. Sus efectos anabólicos desaparecen al cabo de 6-12 meses de tratamiento, por lo que se administra durante períodos de un año, tras lo que debe administrarse un antirresortivo para mantener o incrementar la DMO.

Los resultados de los 3 ensayos fundamentales y varios meta-análisis (48,105–108) indican que el tratamiento con romosozumab durante 12 meses reduce las fracturas vertebrales en mujeres posmenopáusicas y varones (109) con osteoporosis (RRR 66-73%). Asimismo, el análisis combinado revela que disminuye el riesgo de fracturas no vertebrales (RRR 33%) y de cadera (RRR 56%). En mujeres posmenopáusicas con osteoporosis grave y fracturas previas por fragilidad, el tratamiento con romosozumab durante 1 año seguido de alendronato redujo significativamente el riesgo de nuevas fracturas vertebrales, fracturas clínicas y de cadera, en comparación con el tratamiento desde el inicio con alendronato (107).

En general es bien tolerado, pero en algunos estudios se ha descrito que aumenta la frecuencia de eventos cardiovasculares (110). Aunque en términos absolutos la diferencia fue pequeña (1,3% de eventos frente al 0,9% en el grupo control), se considera contraindicado en pacientes con antecedentes de infarto de miocardio o accidente cerebrovascular y debe considerarse cuidadosamente en los que tienen varios factores de riesgo cardiovascular.

En conclusión, tiene un papel definido en el tratamiento de la osteoporosis por disminuir el riesgo de fracturas, tanto vertebrales como periféricas (recomendación A). Deben valorarse los posibles riesgos cardiovasculares y contraindicaciones específicas.

## 16. Vertebroplastia y cifoplastia

Aunque muchos estudios no controlados han mostrado un efecto antiálgico marcado, los ensayos clínicos aleatorizados han ofrecido resultados contradictorios (111–114) y existe controversia sobre el posible aumento del riesgo de fractura en las vértebras adyacentes. Por tanto, estos procedimientos no se recomiendan de manera sistemática (87), ni en pacientes con fracturas vertebrales asintomáticas o con dolor leve, ni en aquellas de más de un año de evolución. Pueden considerarse en pacientes con fracturas de menos de 6 semanas de evolución y dolor intenso a pesar del tratamiento médico; y en pacientes con fracturas de 6 semanas a un año de evolución y dolor persistente que responde mal a los analgésicos, si presentan signos de edema en la resonancia magnética (115). También pueden ser de utilidad en pacientes con contraindicación o mala tolerancia a los analgésicos. La vertebroplastia y la cifoplastia son similares en cuanto a efectividad y seguridad (116). No existe evidencia suficiente sobre la utilidad relativa de los procedimientos que incluyen la inserción de implantes expansivos en comparación con la vertebroplastia y la cifoplastia con balón (recomendación B).

En conclusión, no se recomiendan de manera sistemática la vertebroplastia y técnicas afines en el tratamiento de las fracturas vertebrales, pero pueden ayudar a controlar los síntomas en

pacientes seleccionados (recomendación C). En todo caso, su empleo debe ir acompañado del tratamiento médico de la osteoporosis, encaminado a prevenir nuevas fracturas.

## INICIO Y SEGUIMIENTO DEL TRATAMIENTO

### 1. Decisión de iniciar el tratamiento

No existe una norma consensuada internacionalmente acerca de cuándo hay que instaurar tratamiento en la osteoporosis. La SEIOMM considera que en general se han de tratar las siguientes pacientes:

1. Las que presentan una fractura por fragilidad, especialmente de vértebras, cadera, húmero y pelvis (aunque el valor de DMO no sea indicativo de osteoporosis).
2. Las que presentan una DMO  $\leq -2,5$  T en columna lumbar, cuello femoral o cadera total.
3. Las mujeres con osteopenia (particularmente si la T es  $\leq -2,0$ ) que presentan además factores fuertemente asociados con el riesgo de fractura (p. ej., hipogonadismo o menopausia precoz, tratamiento con glucocorticoides o antiestrógenos, etc.).

No obstante, la SEIOMM considera que existen situaciones que pueden ocasionalmente constituir excepciones a las normas anteriores y requieren una valoración individualizada cuidadosa, considerando los factores de riesgo de fractura y otras características clínicas. Así, en mujeres jóvenes que presentan solo una DMO discretamente baja, sin fracturas ni otros factores de riesgo, puede considerarse retrasar el inicio del tratamiento, pues el riesgo absoluto de fractura es bajo. Al contrario, la coincidencia de varios factores de riesgo importantes puede llevar a considerar más precozmente el tratamiento. Las escalas que ayudan a estimar el riesgo de fractura (p. ej., FRAX) pueden ser de ayuda, aunque su validez en la población española es limitada, como se ha comentado anteriormente.

### 2. Control de la respuesta terapéutica

El control de la adherencia a los tratamientos se puede hacer mediante marcadores de remodelado. Los cambios en dichos marcadores predicen la respuesta terapéutica.

El efecto beneficioso del tratamiento se confirma por la evolución de la DMO y la ausencia de nuevas fracturas. No obstante, hay que tener en cuenta que una sola fractura durante un tratamiento no indica necesariamente fallo terapéutico. Los pacientes ancianos, con demencia, mala calidad de vida o con múltiples fracturas tienen más riesgo de fracaso terapéutico. En los casos en que los BP orales han fracasado, los fármacos de administración parenteral (zoledronato, denosumab o, según las características del paciente, teriparatida o romosozumab) pueden ser una buena opción terapéutica.

Puede plantearse el cambio de tratamiento por posible respuesta inadecuada en las siguientes circunstancias (117): a) Desarrollo de dos fracturas sucesivas; o b) Coincidencia de dos de los tres siguientes factores: desarrollo de una nueva fractura; disminución de la DMO superior al mínimo cambio significativo (que varía según el densitómetro y la región esquelética estudiada, pero suele ser del 4-5%); o descenso de los marcadores de recambio óseo inferior al mínimo cambio significativo (que suele estar en torno al 25%) (recomendación D).

Antes de proceder al cambio terapéutico deben considerarse como causa de posible respuesta inadecuada los siguientes factores: a) falta de vitamina D; b) padecimiento de formas secundarias de osteoporosis; c) cumplimiento inadecuado; d) tendencia a las caídas; e) defectos en las técnicas de medida, tanto de DMO como de marcadores de remodelado; f) existencia de un grave deterioro óseo, que hace que sea esperable una nueva fractura aunque el fármaco sea activo.

Si la razón del cambio es una aparente falta de respuesta, se aconsejan las siguientes opciones (117,118) (Recomendación D):

- \* Elegir un fármaco considerado de mayor capacidad de reducción de fracturas.
- \* Cambiar un antirresortivo por un osteoformador.
- \* Cambiar un fármaco oral por otro inyectable.

### 3. Duración del tratamiento

Estaría justificado interrumpir el tratamiento cuando la relación riesgo/beneficio se hace desfavorable: a) por haber alcanzado los objetivos terapéuticos; b) por pérdida de eficacia; c) por aumento del riesgo de desarrollo de efectos secundarios.

#### a) Consecución de los objetivos

Aunque la estrategia *treat to target* es teóricamente un planteamiento atractivo, los objetivos que se han de alcanzar en el tratamiento de la osteoporosis no están bien definidos, lo que limita su aplicación práctica. Para algunos expertos, la ausencia de nuevas fracturas y el aumento de la DMO serían los más apropiados. Diferentes expertos han recomendado como objetivo el alcanzar un valor de T superior a -2,0 o -2,5, especialmente en cadera (119–121).

#### b) Pérdida de eficacia

El aumento de DMO inducido por los fármacos antirresortivos es más marcado durante los primeros años de tratamiento. Sin embargo, eso no significa que después pierdan su eficacia. Aunque no existe un acuerdo generalizado, varios estudios han mostrado la persistencia de la reducción del riesgo de fractura con el tratamiento con zoledronato durante 6 años, o con alendronato o denosumab durante 10 años, sobre todo en pacientes que mantienen un riesgo basal elevado.

#### c) Aumento del riesgo de desarrollar efectos secundarios indeseables a largo plazo

En este sentido, son particularmente relevantes la ONM y las FAF inducidas por los BP y el denosumab. Ya nos hemos referido a ellas a propósito de los efectos adversos de los antirresortivos. El riesgo absoluto de ONM en los pacientes tratados con antirresortivos por osteoporosis es muy bajo, similar al de la población general, y actualmente no hay evidencia de que la interrupción del tratamiento reduzca el riesgo de ONM o la progresión de la enfermedad en pacientes que requieren procedimientos dentales. El riesgo absoluto de FAF es también muy bajo, si bien el riesgo relativo aumenta con la duración de la exposición a los BP (ver apartado anterior).



A partir de esos hechos, se plantean las siguientes recomendaciones, si bien tienen el carácter de consenso de expertos, sin que haya estudios que las sustenten de una manera definitiva (122–126) (recomendación D):

1. Las pacientes tratadas con BP deben evaluarse a los 3 (zoledronato) o 5 años (BP orales) de tratamiento. Las tratadas con denosumab, a los 5-10 años de tratamiento.
2. Tras dicha evaluación, el tratamiento debe mantenerse (con el mismo fármaco o con otro) si se dan alguna de las siguientes circunstancias:
  - a. DMO en cuello de fémur  $< -2,5$  T.
  - b. Aparición de fracturas por fragilidad en los 3-5 años anteriores a la evaluación.
  - c. Algunos expertos recomiendan también mantener el tratamiento si el paciente tiene antecedentes de fractura de cadera o vertebral en algún momento de la vida.

Si no se da ninguna de estas circunstancias, el tratamiento con BP puede retirarse, al menos, temporalmente.

Si el tratamiento se mantiene, debe reevaluarse después periódicamente la posibilidad de retirarlo. No se sabe cada cuanto tiempo debe realizarse la reevaluación, ni si existe un tiempo máximo de tratamiento. Con frecuencia se establece un límite de 10 años, pues no hay estudios a más largo plazo. No obstante, si la paciente sigue en situación de riesgo, no debe retirarse el tratamiento antiosteoporótico. En ese caso, si se decide retirar el tratamiento antirresortivo, pero la paciente continúa en situación de riesgo, no debe quedar desprotegida, y se debe administrar otro fármaco en su lugar, como un anabólico.

Cuando se retira un tratamiento con BP, la suspensión debe ser temporal («vacaciones terapéuticas»). No se sabe cuál debe ser la duración del tiempo de suspensión, ni cómo decidir cuándo finalizarlo. Se considera que de 1 a 3 años -en función del BP utilizado- puede ser un período adecuado (tal vez 1 año para el risedronato, 2 para el alendronato y 3 para el zoledronato). Se ha sugerido que el control de los marcadores y de la DMO puede ayudar a tomar la decisión, aunque no estamos en condiciones de asegurarlo. En teoría, si la DMO continúa por encima del valor objetivo (p. ej., T superior a -2 o -2,5), tal vez pueda mantenerse sin tratamiento.

En el caso del denosumab no deben realizarse «vacaciones terapéuticas», ya que tras su retirada no solo no existe un efecto residual, sino que el recambio aumenta más allá de los valores basales («efecto rebote»). Este aumento del recambio óseo se asocia a una rápida pérdida de masa ósea y a un incremento del riesgo de desarrollar fracturas vertebrales múltiples. Por ello, se recomienda continuar con la terapia con denosumab indefinidamente o prescribir un BP potente cuando se suspende el denosumab (ver más adelante) (18).

Hay también datos de eficacia y seguridad de los SERM (raloxifeno y bazedoxifeno) hasta 8 años. En estos casos el tratamiento se podría mantener ese tiempo o hasta que aumente el riesgo de fractura de cadera o de algunas complicaciones, como la enfermedad tromboembólica. No se suele recomendar más allá de los 65-70 años.

Con los fármacos osteoformadores, el tratamiento debe mantenerse durante 24 meses si se trata de la teriparatida y 12 meses si se administra romosozumab, seguido en ambos casos de un antirresortivo.

## **4. Tratamiento secuencial y combinado**

### **4.1. Bisfosfonatos tras denosumab**

Como se ha dicho, es mandatorio administrar un BP tras la suspensión del denosumab para limitar el efecto rebote (recomendación A). A la espera de los resultados de los ensayos en curso sobre el régimen óptimo de BP, en los pacientes con un bajo riesgo de fractura y que han seguido tratamiento con denosumab durante un período relativamente corto de tiempo (hasta 2,5 años) se podría administrar un BP oral, como el alendronato, durante 2 años. El zoledronato iv es otra alternativa. El zoledronato es preferible en caso de intolerancia previa a los BP orales, previsible mala adherencia o polifarmacia. Los pacientes que hayan sido tratados con denosumab durante un período más largo (es decir, más de 2,5 años) o que tengan un alto riesgo de fractura deben recibir zoledronato durante 1-2 años. Se recomienda administrar la primera dosis al suspender denosumab (es decir, a los 6 meses de la última dosis) y repetirla cuando se detecten elevaciones de los MRO, en general a los 6 o 12 meses. Si no se dispone de determinaciones de MRO, se podría repetir la administración de zoledronato a los 6 y a los 12 meses (18,127) de la anterior y considerar individualmente la necesidad de nuevas dosis (recomendación D).

No existen ensayos que establezcan cuál es la mejor opción terapéutica en los pacientes que sufren una fractura vertebral tras la suspensión del denosumab. No obstante, se han recomendado las siguientes opciones para esa situación: a) reiniciar denosumab; b) administrar zoledronato; c) administrar teriparatida junto a denosumab (Recomendación D) (18). En los meses siguientes a la suspensión del denosumab, debe evitarse el tratamiento aislado con teriparatida, ya que provoca una pérdida transitoria de masa ósea (128).

### **4.2. Agentes antirresortivos tras anabólicos**

Tras la suspensión del tratamiento con teriparatida o PTH existe una pérdida progresiva de DMO (129). Varios estudios han demostrado que la administración secuencial de un agente antirresortivo previene esa pérdida de masa ósea e incluso induce aumentos adicionales de la DMO (130). No hay datos sobre la prevención de fracturas. Igualmente, al finalizar el tratamiento con romosozumab se recomienda continuar con un antirresortivo (131,132).

En conclusión, tras finalizar el tratamiento con fármacos anabólicos, como teriparatida o romosozumab, se recomienda la administración de fármacos antirresortivos potentes, como BP o denosumab (recomendación A).

### **4.3. Fármacos anabólicos tras antirresortivos**

El efecto anabólico de la PTH depende del tipo de antirresortivo utilizado previamente. Varios estudios han confirmado que el uso previo de BP disminuye y enlentece ligeramente el aumento de DMO obtenido con teriparatida (133,134). Sin embargo, la reducción del riesgo de fracturas asociada con el uso de teriparatida no se ve afectada por el tratamiento previo con BP (135).

En un estudio de mujeres que habían recibido tratamiento con BP, en particular alendronato, se

compararon los efectos de cambiar a romosozumab o teriparatida. Ambos grupos experimentaron aumentos de DMO en columna, pero el cambio a romosozumab indujo al cabo de 12 meses aumentos superiores a los conseguidos con teriparatida, especialmente en la cadera (136).

Por el contrario, en mujeres posmenopáusicas, el inicio de teriparatida tras realizar un ciclo de tratamiento con denosumab dio lugar a una disminución transitoria de DMO (128). Por tanto, no debe administrarse teriparatida tras la suspensión de denosumab.

En conclusión, aunque, en caso de utilizar un fármaco osteoformador, la secuencia preferida implica utilizar primero un fármaco anabólico y después un antirresortivo, el tratamiento previo con BP no contraindica la administración de teriparatida o romosozumab si se considera adecuada para disminuir el riesgo de fractura (recomendación A). Se debe evitar el inicio de teriparatida en los meses siguientes a la suspensión de denosumab, dado el riesgo de pérdida acelerada de masa ósea (recomendación A).

#### **4.4.Tratamiento combinado**

- La combinación de dos fármacos antirresortivos (estrógenos y BP) puede potenciar la ganancia de masa ósea conseguida con cada uno de ellos (137), pero existen dudas sobre la relación riesgo-beneficio de la asociación en comparación con los fármacos aislados, por lo que no se recomienda.
- La combinación de BP y teriparatida no ha demostrado beneficios claros sobre la administración aislada de cada uno de ellos, por lo que no se recomienda. No obstante, en un estudio la combinación de zoledronato y teriparatida resultó en una mayor DMO en cadera que la teriparatida aislada (138).
- En un ensayo, el uso de denosumab en combinación con teriparatida indujo un aumento superior de la DMO en cadera y columna que el logrado con los fármacos por separado (139).

En conclusión, dada la ausencia de datos sobre prevención de fracturas y los mayores costes y efectos secundarios de la asociación, por el momento no se recomienda de forma general la terapia combinada. No obstante, la combinación denosumab+teriparatida o zoledronato+teriparatida puede considerarse de manera individualizada en casos particularmente graves con alto riesgo de fractura de cadera. En esos casos, puede ser preferible retrasar el comienzo del antirresortivo 1-2 meses tras empezar con teriparatida, para aprovechar mejor su efecto anabólico (grado recomendación D).

### **5. Algoritmos de decisión terapéutica**

El algoritmo propuesto se basa en los datos de los ensayos publicados y una serie de consideraciones que se resumen a continuación.

**5.1. Tratamiento inicial (elección de fármaco, figura 1).** El principal criterio para la elección del fármaco inicial es el nivel de riesgo de fractura. Distinguimos tres niveles de riesgo (moderado, alto y muy alto):

- 1) **Riesgo moderado.** Corresponde al perfil de riesgo de una mujer de menos de 65 años, sin antecedentes de fractura, con un índice T en columna entre -2,5 y -3,0, y una DMO en cadera relativamente preservada (índice T en cadera  $>-2$ ). Para esta situación es aconsejable utilizar un SERM. La razón principal es que ello permite retrasar el uso de fármacos que puedan producir FAF y ONM en tratamientos prolongados. No obstante, el ibandronato y los antirresortivos recomendados para las situaciones de «riesgo alto» son fármacos de segunda elección en esta situación, que representan alternativas aceptables si por algún motivo se prefiere evitar los SERM.
- 2) **Riesgo alto.** A este nivel de riesgo pertenecen la mayor parte de los casos que se encontrarán en la clínica (ver sección Decisión de iniciar tratamiento). No reúnen las características de riesgo moderado, ni de riesgo muy alto que se exponen a continuación. Para las pacientes con riesgo alto están indicados el alendronato, el risedronato, el zoledronato y el denosumab. Los BP orales se consideran preferibles cuando no existe inconveniente para la administración oral (problemas digestivos, polimedicación, adherencia) y preferentemente por debajo de los 75 años. Los antirresortivos inyectables se consideran preferibles en caso contrario. Merece señalarse que la mayor parte de las personas con fractura de cadera tienen más de 75 años y corresponden al segundo grupo, por lo que en ellos en general resultan preferibles los antirresortivos inyectables. Dado el efecto rebote tras la suspensión del denosumab, en caso de dudas sobre el cumplimiento, puede ser preferible el zoledronato.
- 3) **Riesgo muy alto.** Consideramos como tal al correspondiente a alguna de las siguientes situaciones: a) presencia de 2 o más fracturas vertebrales, o situación equivalente (p. ej., fractura vertebral y de cadera); b) DMO muy baja (p. ej., índice  $T < -3,5$ ) o c) fractura vertebral o de cadera junto a  $T < -3,0$ . Puede haber otras situaciones, difícilmente sistematizables, en las que los factores clínicos determinen un riesgo de fractura muy alto y que requieren una consideración individualizada. Para este nivel de riesgo deben utilizarse los fármacos osteoformadores: teriparatida o romosozumab. El segundo puede tener una mejor relación coste-beneficio (a falta de conocer su precio de comercialización en el momento de redactar estas guías), pero una relación riesgo-beneficio menos favorable, por el posible aumento de eventos cardiovasculares (debe evitarse en pacientes con enfermedad cardiovascular o alto riesgo). No obstante, en el momento de redactarse estas guías, estas recomendaciones deben considerarse como provisionales, a la espera de la comercialización en España y acumular experiencia en nuestra población.

Aunque algunos autores han sugerido el tratamiento con un fármaco osteoformador para todos los pacientes con una fractura reciente, sobre todo si es vertebral, no existe consenso sobre ello entre los expertos. En todo caso, sea cual sea el tratamiento indicado, se debe tratar de comenzar tan pronto como sea posible, dado el riesgo de nuevas fracturas.

**5.2. Tratamiento a largo plazo** (figura 2). El romosozumab sólo debe administrarse durante 1 año y la teriparatida durante 2. Dado que solo existen datos de eficacia y seguridad hasta 8 años de tratamiento, se debe considerar la retirada de los SERM tras ese período, o bien cuando la paciente llega a los 65-70 años o si aumenta su nivel de riesgo de fractura. Generalmente, después será necesario administrar otro antirresortivo. La discusión sobre el tratamiento a largo plazo queda por tanto restringida a los BP y el denosumab. Un factor diferenciador fundamental, en el momento en que se escriben estas guías, es la posibilidad de una interrupción temporal o «vacaciones terapéuticas», que se desaconsejan para el denosumab, pero se aceptan para los BP.

1) Denosumab. Se preconiza su uso continuado durante 5-10 años. En la actualidad, no se dispone de información respecto a un uso más prolongado, por lo que llegado ese momento deberá tomarse de manera cuidadosa la decisión de continuar el tratamiento o suspenderlo. Cuando se interrumpe su administración, bien por haber alcanzado los 10 años o bien por otra razón, debe administrarse un BP, alendronato o zoledronato (siendo este último preferible si el tratamiento con denosumab se prolongó durante más de 2-3 años) (ver sección 4.1).

2) Bisfosfonatos. En relación con su uso cabe distinguir tres períodos:

- Primer período (5 años de BP orales o 3 años de zoledronato): se aconseja administrar el fármaco sin interrupción, durante un período de 5 años en el caso de los BP orales y de 3 años para el zoledronato.
- Segundo período: tras ese primer período (es decir, tras 5 años de BP orales o 3 años de zoledronato) se puede interrumpir el tratamiento temporalmente si se cumplen los requisitos necesarios para iniciar unas «vacaciones terapéuticas» (ver requisitos en texto anterior). Una vez en ellas debe valorarse periódicamente la necesidad de reinstaurar el tratamiento. Posteriormente se podrá volver a valorar la posibilidad de realizar una nueva suspensión temporal.
- Tercer período (tras 10 años de tratamiento continuado o intermitente con BP orales, o 6 años de tratamiento con zoledronato): no se dispone de estudios de calidad para guiar la toma de decisiones. Por extrapolación de lo propuesto para el segundo período, cabe pensar que si el paciente cumple los requisitos necesarios, puede pasar a un régimen de «vacaciones terapéuticas». En caso contrario, se deberá elegir entre las siguientes tres opciones dependiendo del contexto y el juicio clínico:
  - a) Mantener el tratamiento (con lo que aumenta el riesgo de complicaciones, pero se mantiene bajo el riesgo de fracturas osteoporóticas).
  - b) Suspender el tratamiento (con lo que disminuye el riesgo de complicaciones, pero podría aumentar el de fracturas osteoporóticas).
  - c) Administrar teriparatida, con lo que se considera que disminuyen tanto el riesgo de complicaciones como el de fracturas osteoporóticas.

## OSTEOPOROSIS DEL VARÓN

La evidencia disponible respecto al tratamiento de la osteoporosis masculina es escasa. La mayor parte de los estudios han tenido como objetivo primario la DMO. Respecto a esta, los resultados son similares a los observados en mujeres, lo que hace pensar que su eficacia es probablemente similar también en términos de fracturas. De hecho, BP como alendronato, risedronato, zoledronato han demostrado una disminución de fracturas vertebrales en estos pacientes (140–144). El denosumab ha demostrado aumentar las DMO en varones y reducir el riesgo de fractura en los sometidos a tratamiento de privación androgénica (145,146). También la teriparatida ha mostrado efectos beneficiosos en varones (147,148). Por esta razón cabe plantear para el varón una estrategia de elección de fármaco similar a la de la mujer:

- a) Risedronato o alendronato (aunque este último no está aprobado en España para el tratamiento de la osteoporosis masculina) en los pacientes sin criterios restrictivos para la administración oral, según se describen a propósito de la osteoporosis posmenopáusica.
- b) Zoledronato o denosumab en los enfermos con dichos criterios o de más edad y por ello mayor riesgo de fractura de cadera.
- c) Teriparatida en caso de osteoporosis establecida con alto riesgo de fractura. Aunque, al igual que en las mujeres, el romozosumab también induce ganancias de DMO en los varones (109), en la actualidad no está aprobado su uso en la osteoporosis del varón.

Es recomendable una ingesta correcta de calcio, preferiblemente a través de la dieta, y la administración de vitamina D en caso de insuficiencia. Los andrógenos solo están justificados si existe un hipogonadismo asociado y cuando no existan contraindicaciones para su utilización. Aun en ese caso, es recomendable asociar alguno de los fármacos anteriores con eficacia antifracturaria demostrada. Cuando se detecte hipercalciuria puede valorarse la administración de tiazidas (recomendación D).

## OSTEOPOROSIS INDUCIDA POR GLUCOCORTICOIDES

Los fármacos de elección son los BP (149–151). Si el paciente presenta fracturas vertebrales, está justificado el tratamiento preferente con teriparatida por su mayor efecto antifracturario (152,153) (recomendación A). Deben administrarse también calcio y vitamina D. Los metabolitos activos de la vitamina D tienen por sí mismos una cierta acción preventiva sobre la pérdida ósea, pero no disponemos de datos convincentes respecto a su efecto en la prevención de fracturas (154).

Deben ser tratadas las mujeres posmenopáusicas y los varones de más de 50 años que reciban o vayan a recibir dosis de prednisona iguales o superiores a 5 mg/d (o sus equivalentes en otros corticoides) durante más de tres meses. En las mujeres premenopáusicas y los varones de menos de 50 años, el tratamiento está indicado solo si existen fracturas previas, la DMO es baja o la dosis de glucocorticoides a utilizar es muy elevada (p. ej., >30 mg/día de prednisona durante más de 3 meses).

El tratamiento debe mantenerse mientras el enfermo reciba corticoides. Si estos se suspenden debe evaluarse el riesgo de fractura individualmente, y cuando el mismo no sea elevado puede suspenderse.

El denosumab produce aumento de la DMO superior a los BP en los pacientes que reciben corticoides, pero la disminución del riesgo de fractura es similar con ambos fármacos y los efectos adversos también (155–157). Dado, por una parte, el efecto rebote observado en algunos pacientes al suspenderse el denosumab (158) y, por otra, la posibilidad de retirar el tratamiento antirresortivo al suspender los corticoides, el denosumab debe indicarse cuando no sea posible utilizar otros antirresortivos y el riesgo de fractura sea elevado.

En los pacientes con corticoides puede estar justificado un control densitométrico a intervalos más cortos que en la osteoporosis posmenopáusica (recomendación D).

### Conflictos de intereses

Los conflictos de intereses individuales de los autores que los tienen son:

**Antonio Cano:** honorarios por conferencias (Gedeon Richter) y consejos consultivos (Theramex). **Cristina Carbonell Abella:** honorarios por conferencias (Amgen, UCB, Stada, Theramex, Angelini, Gebro) y bolsas de viaje (Amgen, Rubio). **Enrique Casado Burgos:** honorarios por conferencias (Ucb, Gedeon-Richter, Stada, Grunenthal, Lilly, Amgen, Theramex, Gebro, Italfarmaco, Angelini), bolsas de viaje (Lilly, Amgen, Stada) y consejos consultivos (Theramex, Bayern, Gp-Pharm, Gebro, Gedeon-Richter, Stada). **Manuel Ciria Recasens:** honorarios por conferencias (Grunenthal, Angelini, Gedeon Richter, Theramex, Rubio, Gebro Pharma) y bolsas de viaje (Amgen, Lilly, Rubio). **Javier del Pino Montes:** honorarios por conferencias (Gedeon-Ritcher, Grünenthal, Ucb) y bolsas de viaje (Amgen). **Luis Miguel del Rio Barquero:** honorarios por conferencias (Amgen, Gedeon-Richter). **Manuel Díaz Curiel:** bolsas de viaje (Rubio). **Adolfo Díez Pérez:** acciones, empleado (Active Life Sci) y honorarios por conferencias (Amgen, Lilly, Theramex). **Alberto García Vadillo:** honorarios por conferencias (Lilly. Amgen. Gebro-Pharma. Theramex) y bolsas de viaje (UCB. Lilly. Amgen). **Carlos Gómez Alonso:** acciones (Faes), honorarios por conferencias (Stada, Grünenthal, Amgen, UCB), bolsas de viaje (Amgen), becas de investigación (Stada, Kiowa Kirin, FAES) y consejos consultivos (Amgen, Kiowa Kirin). **Jesús González Macías:** honorarios por conferencias (Amgen-UCB, Gedeon Richter, Menarini, Theramex), bolsas de viaje (Lilly) y becas de investigación (Faes). **Nuria Guañabens:** honorarios por conferencias (Eli Lilly, Amgen, UCB), bolsas de viaje (Eli Lilly, Amgen, UCB) y consejos consultivos (Amgen, UCB). **Esteban Jodar Gimeno:** acciones, empleado (SICAM SL, Cajal PME, H&B), honorarios por conferencias (Amgen, Asofarma, Astelas, Astra-Zeneca, Bayer, Boehringer Ingelheim, Faes, Janssen, Lilly, Msd, Novartis, Novo Nordisk, Viatrix), bolsas de viaje (Amgen, Lilly, Novonordisk, UCB), becas de investigación (Amgen, Astra-Zeneca, Boehringer Ingelheim, Faes, Janssen, Lilly, Msd, Novo Nordisk Pfizer & Sanofi) y consejos consultivos (Amgen, Astrazeneca, Faes, Fresenius, Italfármaco, Janssen, Lilly, Msd, Mundipharma, Novo Nordisk, Shire & Ucb). **Jorge Malouf Sierra:** honorarios por conferencias (Theramex, Amgen, Anghelini), bolsas de viaje (Lilly) y consejos consultivos (Amgen, UCB). **Guillermo Martínez Díaz-Guerra:** honorarios por conferencias (Lilly, Amgen, Ucb, Angelini Pharma, Italfarmaco, Kyowa Kirin), bolsas de viaje (Lilly, Amgen, UCB), becas de investigación (Amgen) y consejos

consultivos (Lilly, Amgen, Ucb, Alexion, Shire, Kyowa Kirin). **Ana Monegal Brancos:** bolsas de viaje (Amgen, Lilly). **Manuel Muñoz Torres:** honorarios por conferencias (Amgen, Ucb, Grünenthal Pharma, Stada, Meiji, Gedeon Richter, Ferrer) y consejos consultivos (Amgen, UCB, Meiji). **Manuel Naves Díaz:** honorarios por conferencias (Grünenthal, Gedeon Richter) y bolsas de viaje (Amgen, Ucb). **Xavier Nogués:** honorarios por conferencias (Ucb, Amgen, Lilly, Faes, Italfarmaco), bolsas de viaje (Amgen) y consejos consultivos (UCB, Amgen). **Joan M Nolla:** honorarios por conferencias (Amgen, Lilly) y bolsas de viaje (Amgen, Lilly). **José Luis Pérez-Castrillón:** honorarios por conferencias (Msd, Lilly, Amgen, Ucb, Gedeon-Ritcher, Gruggental), bolsas de viaje (Gedeon-Ritcher, Msd, Amgen, Italfarmaco), becas de investigación (Pfizer) y consejos consultivos (Faes). **Pilar Peris Bernal:** honorarios por conferencias (Amgen, UCB, Lilly, Kyowa Kirin). **José Manuel Quesada Gómez:** honorarios por conferencias (Amgen, Faes, Ferrer, Gebro Pahrma, Grünenthal, Procure Health Iberia, S. L., Theramex), bolsas de viaje (Amgen, Faes), becas de investigación (Faes) y consejos consultivos (Amgen, Shire). **José A. Riancho:** honorarios por conferencias (Amgen, Ucb, Lilly, Merck), bolsas de viaje (Amgen, UCB, Lilly, Merck, Takeda) y becas de investigación (Alexion, Kyowa-Kirin). **Minerva Rodríguez García:** honorarios por conferencias (Amgen, Kiowa Kyrin), bolsas de viaje (Rubió, Amgen, Vifor). **Carmen Valero Díaz de Lamadrid:** honorarios por conferencias (Amgen).

## Financiación

Estas guías se han realizado con el apoyo administrativo de la SEIOMM, sin que haya contado con financiación pública o privada.

## Anexo I

Los miembros del **grupo de expertos de la SEIOMM** para la revisión de las guías de osteoporosis son:

- Jorge Cannata Andía. Departamento de Medicina. Universidad de Oviedo. Oviedo. España.
- Antonio Cano. Servicio de Ginecología y Obstetricia, Hospital Clínico Universitario de Valencia- INCLIVA. Valencia. España.
- Cristina Carbonell Abella. Centro de Salud vía Roma Barcelona. Universidad de Barcelona. Barcelona. España.
- Enrique Casado Burgos. Servicio de Reumatología. Hospital Universitari Parc Taulí. Instituto de Investigación e Innovación Parc Taulí, Sabadell (Barcelona). España.
- Manuel Ciria Recasens. Servicio de Reumatología. Hospital de Parc de Salut Mar, Barcelona. España.
- Luis Corral-Gudino. Servicio de Medicina Interna, Hospital Universitario Río Hortega. Valladolid. España.
- Javier del Pino Montes. Servicio de Reumatología. Hospital Universitario de Salamanca. Salamanca. España.
- Luis Miguel del Río Barquero. CETIR Centro Médico. Barcelona. España.
- Manuel Díaz Curiel. Enfermedades Metabólicas Óseas. Fundación Jiménez Díaz. Madrid. España.



- Adolfo Díez Pérez. Instituto Hospital del Mar de Investigaciones Médicas. Barcelona. España.
- Alberto García Vadillo. Servicio de Reumatología. Hospital Universitario de la Princesa. Universidad Autónoma de Madrid. Madrid. España.
- Carlos Gómez Alonso. UGC Metabolismo Óseo. Hospital Universitario Central de Asturias. ISPA. Universidad de Oviedo. Oviedo. España.
- María Jesús Gómez de Tejada Romero. Departamento de Medicina. Universidad de Sevilla. España
- Jesús González Macías. Departamento de Medicina y Psiquiatría. Universidad de Cantabria. Santander. España.
- Nuria Guañabens. Servicio de Reumatología. Hospital Clínic. IDIBAPS. Universidad de Barcelona. Barcelona. España.
- Federico Hawkins Carranza. Unidad de Metabolismo Óseo, Instituto de Investigación, Hospital Universitario 12 de Octubre. Madrid. España.
- Esteban Jódar Gimeno. Departamento de Endocrinología. Quirón Salud Madrid. Madrid. España.
- Jorge Malouf Sierra. Unidad de Metabolismo Mineral, Departamento de Medicina Interna, Hospital de la Santa Creu i Sant Pau, Barcelona. España.
- Guillermo Martínez Díaz-Guerra. Servicio de Endocrinología, Hospital Universitario 12 de Octubre. Madrid. España.
- Ana Monegal Brancos. Servicio de Reumatología. Hospital Clínic. Barcelona. España.
- Manuel Muñoz Torres. UGC Endocrinología y Nutrición, Hospital Universitario Clínico San Cecilio, Universidad de Granada. Granada. España.
- Manuel Naves Díaz. UGC Metabolismo Óseo. Hospital Universitario Central de Asturias. ISPA. RedinREN del ISCIII. Oviedo. España.
- Xavier Nogues. Departamento de Medicina Interna. Hospital del Mar. Universidad Pompeu Fabra. Barcelona. España.
- Joan M Nolla. Servicio de Reumatología. IDIBELL-Hospital Universitari de Bellvitge. L'Hospitalet de Llobregat (Barcelona). España.
- José Manuel Olmos Martínez. Servicio de Medicina Interna. Hospital Universitario Marqués de Valdecilla-IDIVAL. Universidad de Cantabria. Santander. España
- José Luis Pérez-Castrillón. Hospital Universitario Río Hortega. Universidad de Valladolid. Valladolid. España.
- Pilar Peris Bernal. Servicio de Reumatología. Hospital Clínic. Universidad de Barcelona. Barcelona. España.
- José Manuel Quesada Gómez. Instituto Maimónides de Investigación Biomédica de Córdoba (IMIBIC). Hospital Universitario Reina Sofía. Universidad de Córdoba. Córdoba. España.
- José A. Riancho. Servicio de Medicina Interna. Hospital Universitario Marqués de Valdecilla-IDIVAL. Universidad de Cantabria. Santander. España.
- Minerva Rodríguez García. Servicio de Nefrología. Hospital Universitario Central de Asturias. Oviedo. España.
- Manuel Sosa Henríquez. Universidad de Las Palmas de Gran Canaria. Hospital Universitario Insular. Unidad Metabólica Ósea. Las Palmas de Gran Canaria. España.
- Antonio Torrijos Eslava. Sociedad Española de Investigación Ósea y del Metabolismo Mineral (SEIOMM). Madrid. España.

- Carmen Valero Díaz de Lamadrid. Servicio de Medicina Interna. Hospital Universitario Marqués de Valdecilla. IDIVAL. Santander. Universidad de Cantabria. Oviedo. España.

## Tablas y figuras

**Tabla 1.** Enfermedades y tratamientos que constituyen factores de riesgo de osteoporosis.

### 1. Factores claramente asociados a osteoporosis

- Hipogonadismo
- Menopausia precoz, amenorrea
- Anorexia nerviosa
- Malabsorción
- Artritis reumatoide
- Diabetes (particularmente la de tipo 1)
- Inmovilización
- Enfermedad de Cushing
- Fármacos
  - Glucocorticoides
  - Inhibidores de la aromatasa
  - Agonistas de las hormonas liberadoras de gonadotropinas

### 2. Otros factores asociados con menor consistencia

- Hiperparatiroidismo. Hipertiroidismo
- Déficit de calcio
- Déficit de vitamina D
- Fármacos y tóxicos
  - Inhibidores selectivos de la recaptación de serotonina
  - Inhibidores de la bomba de protones
  - Anticonvulsivantes
  - Antirretrovirales
  - Alcohol, tabaco

**Tabla 2.** Criterios diagnósticos de osteoporosis de la OMS.

Normal DMO  $T \geq -1$

Osteopenia o densidad mineral ósea baja: DMO  $T < -1$  y  $> -2,49$

Osteoporosis DMO  $T \leq -2,5$

Osteoporosis grave DMO  $T \leq -2,5$  + fractura

DMO: densidad mineral ósea; T (T-score o índice T): comparación con valor DMO alcanzado en población joven de referencia.

**Figura 1.** Algoritmo de selección del tratamiento inicial en la osteoporosis posmenopáusica. SERM: modulador selectivo del receptor de estrógenos.

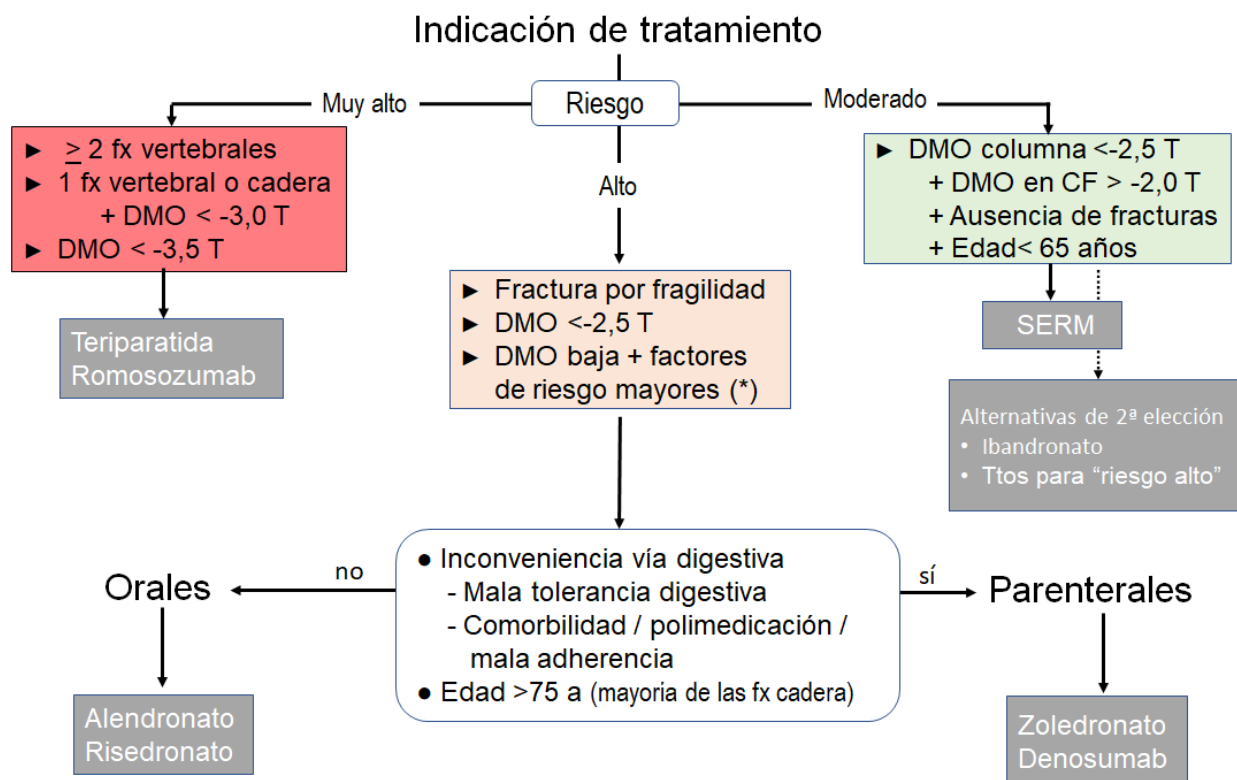

(\*) \* Sobre todo si  $T \leq -2$  y factores fuertemente asociados con el riesgo de fractura, como hipogonadismo, menopausia precoz, o tratamiento con glucocorticoides o antagonistas de hormonas sexuales. Estos criterios generales pueden necesitar adaptación en virtud de otros factores clínicos determinantes del riesgo de fractura, las características de los pacientes individuales y sus preferencias.

CF: cuello femoral; DMO: densidad mineral ósea; fx: fractura; SERM: modulador selectivo del receptor de estrógenos; Ttos: tratamientos.

**Figura 2.** Algoritmo de continuación del tratamiento a largo plazo.

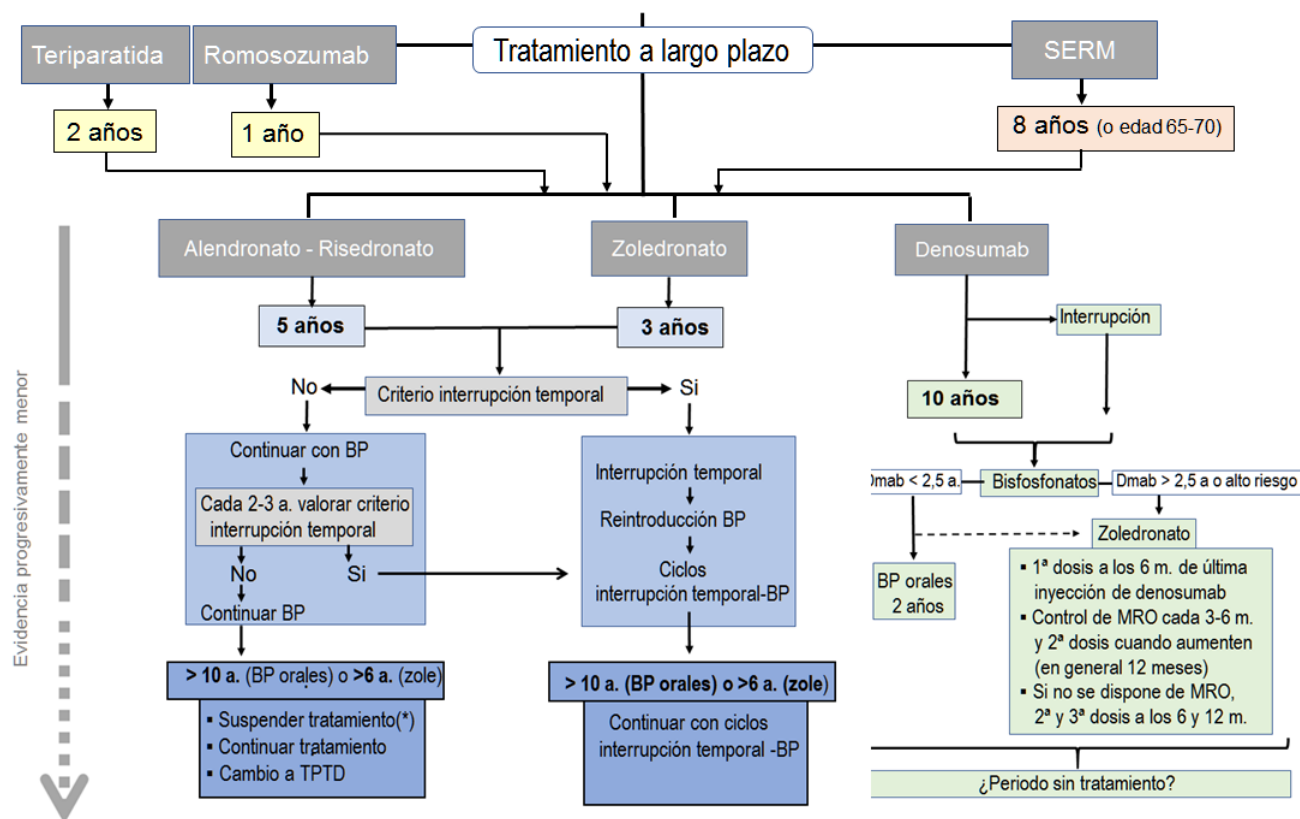

(\*) No existen datos suficientes para establecer una recomendación pasado ese tiempo de tratamiento, por lo que se enumeran las opciones posibles ante una decisión que deberá ser individualizada.

BP: bisfosfonatos; SERM: moduladores selectivos del receptor de estrógenos; MRO: marcadores de recambio óseo; TPTD: teriparatida.

## ANEXO II. Tablas suplementarias

**Tabla S1. Niveles de evidencia según el Centro Oxford de medicina basada en la evidencia para estudios que evalúan terapia, prevención o daño**

### Nivel

- 1a Revisiones sistemáticas de ECA con homogeneidad entre los estudios individuales o varios ECA con resultados similares
- 1b ECA individual con intervalo de confianza estrecho
- 2a Revisión sistemática de estudios de cohortes con homogeneidad entre los estudios individuales
- 2b Estudio de cohortes individual o un ECA de baja calidad
- 2c Investigación de «resultados»; estudios ecológicos
- 3a Revisión sistemática de estudios de casos y controles con homogeneidad entre los estudios individuales
- 3b Estudio individual de casos y controles
- 4 Series de casos y estudios de baja calidad de cohortes y casos y controles
- 5 Opiniones de expertos sin valoración crítica explícita, o basada en la fisiología, investigación básica o «primeros principios»

ECA: ensayo clínico aleatorizado.

**Tabla S2. Grados de recomendación del Centro Oxford de medicina basada en la evidencia según los niveles de evidencia**

### Recomendación Tipo de estudios

- A Estudios de nivel 1 (ensayos clínicos aleatorizados) consistentes. Por consistencia se entiende homogeneidad (concordancia) en los resultados de los distintos estudios individuales
- B Estudios de nivel 2 (estudios de cohortes) o 3 (estudios de casos y controles) consistentes o extrapolaciones de estudios de nivel 1
- C Estudios de nivel 4 (series de casos y estudios de baja calidad de cohortes o casos y controles) o extrapolaciones de estudios de nivel 2 o 3
- D Pruebas de nivel 5 (opiniones de expertos o estudios no concluyentes o inconsistencia problemática entre ellos, cualquiera que sea su nivel)

## BIBLIOGRAFÍA

1. González-Macías J, Del Pino-Montes J, Olmos JM, Nogués X. Guías de práctica clínica en la osteoporosis posmenopáusica, glucocorticoidea y del varón. Sociedad Española de Investigación Ósea y del Metabolismo Mineral (3.<sup>a</sup> versión actualizada 2014). *Rev Clínica Española*. 2015 Dec 1;215(9):515–26.
2. US Department of Health and Human Services. Bone health and osteoporosis: a report of the Surgeon General. *US Heal Hum Serv*. 2004;437.
3. Ambrose AF, Paul G, Hausdorff JM. Risk factors for falls among older adults: A review of the literature. *Maturitas*. 2013;75(1):51–61.
4. Roux C, Briot K. Imminent fracture risk. *Osteoporos Int*. 2017 Jun 1;28:1765–9.
5. Balasubramanian A, Zhang J, Chen L, Wenkert D, Daigle S, Grauer A, et al. Risk of subsequent fracture after prior fracture among older women. *Osteoporos Int*. 2019 Jan 18;30:79–92.
6. Hannan M, Weycker D, McLean R, Sahni S, Bornheimer R, Barron R, et al. Predictors of Imminent Risk of Nonvertebral Fracture in Older, High-Risk Women: The Framingham Osteoporosis Study. *JBMR plus*. 2019 Jun 1;3:e10129.
7. Marshall D, Johnell O, Wedel H. Meta-analysis of how well measures of bone mineral density predict occurrence of osteoporotic fractures. *Br Med J*. 1996 May 18;312(7041):1254–9.
8. Kanis JA, Melton LJ, Christiansen C, Johnston CC, Khaltsev N. The diagnosis of osteoporosis. *J Bone Miner Res*. 1994;9(8):1137–41.
9. Kanis JA, McCloskey E V, Johansson H, Oden A, Melton LJ, Khaltsev N. A reference standard for the description of osteoporosis. *Bone*. 2008;42(3):467–75.
10. Lewiecki EM, Gordon CM, Baim S, Leonard MB, Bishop NJ, Bianchi M-L, et al. International Society for Clinical Densitometry 2007 Adult and Pediatric Official Positions. *Bone*. 2008;43(6):1115–21.
11. Schousboe JT, Shepherd JA, Bilezikian JP, Baim S. Executive Summary of the 2013 International Society for Clinical Densitometry Position Development Conference on Bone Densitometry. *J Clin Densitom*. 2013 Oct 1;16(4):455–66.
12. Sornay-Rendu E, Munoz F, Garnero P, Duboeuf F, Delmas PD. Identification of osteopenic women at high risk of fracture: the OFELY study. *J Bone Miner Res*. 2005;20:1813–9.
13. Schuit SCE, Van Der Klift M, Weel AEAM, De Laet CEDH, Burger H, Seeman E, et al. Fracture incidence and association with bone mineral density in elderly men and women: The Rotterdam Study. *Bone*. 2004;34(1):195–202.
14. Nelson HD, Helfand M, Woolf SH, Allan JD. Screening for Postmenopausal Osteoporosis: A Review of the Evidence for the U.S. Preventive Services Task Force. *Ann Intern Med*. 2002;137(6):529.
15. Kanis JA, Oden A, Johnell O, Johansson H, De Laet C, Brown J, et al. The use of clinical risk factors enhances the performance of BMD in the prediction of hip and osteoporotic

- fractures in men and women. *Osteoporos Int.* 2007;18(8):1033–46.
16. Hochberg MC, Greenspan S, Wasnich RD, Miller P, Thompson DE, Ross PD. Changes in bone density and turnover explain the reductions in incidence of nonvertebral fractures that occur during treatment with antiresorptive agents. *J Clin Endocrinol Metab.* 2002;87:1586–92.
17. Eastell R, Szulc P. Use of bone turnover markers in postmenopausal osteoporosis. *Lancet Diabetes Endocrinol.* 2017;5(11):908–23.
18. Tsourdi E, Zillikens MC, Meier C, Body J-J, Gonzalez Rodriguez E, Anastasilakis AD, et al. Fracture Risk and Management of Discontinuation of Denosumab Therapy: A Systematic Review and Position Statement by ECTS. *J Clin Endocrinol Metab.* 2020;106(1):264–81.
19. Seeley DG, Browner WS, Nevitt MC, Genant HK, Deott JC, Cummings SR. Which fractures are associated with low appendicular bone mass. *Ann Intern Med.* 1991;115:837–42.
20. Jiang G, Eastell R, Barrington NA, Ferrar L. Comparison of methods for the visual identification of prevalent vertebral fracture in osteoporosis. *Osteoporos Int.* 2004;15(11):887–96.
21. Schousboe JT, Vokes T, Broy SB, Ferrar L, McKiernan F, Roux C, et al. Vertebral Fracture Assessment: The 2007 ISCD Official Positions. *J Clin Densitom.* 2008;11(1):92–108.
22. Koh LKH, Ben Sedrine W, Torralba TP, Kung A, Fujiwara S, Chan SP, et al. A Simple Tool to Identify Asian Women at Increased Risk of Osteoporosis. *Osteoporos Int.* 2001;12(8):699–705.
23. Richy F, Gourlay M, Ross PD, Sen SS, Radican L, De Ceulaer F, et al. Validation and comparative evaluation of the osteoporosis self-assessment tool (OST) in a Caucasian population from Belgium. *QJM An Int J Med.* 2004;97(1):39–46.
24. Kanis JA, Johnell O, Oden A, Johansson H, McCloskey E. FRAX and the assessment of fracture probability in men and women from the UK. *Osteoporos Int.* 2008/02/22. 2008 Apr;19(4):385–97.
25. Nguyen ND, Frost SA, Center JR, Eisman JA, Nguyen T V. Development of prognostic nomograms for individualizing 5-year and 10-year fracture risks. *Osteoporos Int.* 2008;19(10):1431–44.
26. Hippisley-Cox J, Coupland C. Predicting risk of osteoporotic fracture in men and women in England and Wales: prospective derivation and validation of QFractureScores. *BMJ.* 2009 Nov 19;339:b4229–b4229.
27. Bolland MJ, Siu ATY, Mason BH, Horne AM, Ames RW, Grey AB, et al. Evaluation of the FRAX and Garvan fracture risk calculators in older women. *J Bone Miner Res.* 2011;26(2):420–7.
28. Cummins NM, Poku EK, Towler MR, O'Driscoll OM, Ralston SH. Clinical Risk Factors for Osteoporosis in Ireland and the UK: A Comparison of FRAX and QFractureScores. *Calcif Tissue Int.* 2011;89(2):172–7.



29. González-Macías J, Marin F, Vila J, Díez-Pérez A. Probability of fractures predicted by FRAX® and observed incidence in the Spanish ECOSAP Study cohort. *Bone*. 2012;50(1):373–7.
30. Ross AC, Manson JE, Abrams SA, Aloia JF, Brannon PM, Clinton SK, et al. The 2011 report on dietary reference intakes for calcium and vitamin D from the Institute of Medicine: what clinicians need to know. *J Clin Endocrinol Metab*. 2011 Jan;96(1):53–8.
31. Goodwin VA, Abbott RA, Whear R, Bethel A, Ukoumunne OC, Thompson-Coon J, et al. Multiple component interventions for preventing falls and fall-related injuries among older people: systematic review and meta-analysis. *BMC Geriatr*. 2014 Feb 5;14:15.
32. Kanis JA, Johnell O, Oden A, Johansson H, De Laet C, Eisman JA, et al. Smoking and fracture risk: a meta-analysis. *Osteoporos Int*. 2005;16(2):155–62.
33. Kanis JA, Johansson H, Johnell O, Oden A, De Laet C, Eisman JA, et al. Alcohol intake as a risk factor for fracture. *Osteoporos Int*. 2005;16:737–42.
34. Morello RT, Soh S-E, Behm K, Egan A, Ayton D, Hill K, et al. Multifactorial falls prevention programmes for older adults presenting to the emergency department with a fall: systematic review and meta-analysis. *Inj Prev*. 2019;25(6):557–64.
35. Vlaeyen E, Coussement J, Leysens G, Van der Elst E, Delbaere K, Cambier D, et al. Characteristics and Effectiveness of Fall Prevention Programs in Nursing Homes: A Systematic Review and Meta-Analysis of Randomized Controlled Trials. *J Am Geriatr Soc*. 2015;63(2):211–21.
36. Santesso N, Carrasco-Labra A, Brignardello-Petersen R. Hip protectors for preventing hip fractures in older people. *Cochrane Database Syst Rev*. 2014 Mar 31;(3):CD001255.
37. Peris P, Martínez-Ferrer A, Monegal A, Martínez de Osaba MJ, Muxi A, Guañabens N. 25 hydroxyvitamin D serum levels influence adequate response to bisphosphonate treatment in postmenopausal osteoporosis. *Bone*. 2012;51(1):54–8.
38. Olmos JM, Hernández JL, Llorca J, Nan D, Valero C, González-Macías J. Effects of 25-Hydroxyvitamin D3 Therapy on Bone Turnover Markers and PTH Levels in Postmenopausal Osteoporotic Women Treated with Alendronate. *J Clin Endocrinol Metab*. 2012;97(12):4491–7.
39. Holick MF, Binkley NC, Bischoff-Ferrari HA, Gordon CM, Hanley DA, Heaney RP, et al. Evaluation, Treatment, and Prevention of Vitamin D Deficiency: an Endocrine Society Clinical Practice Guideline. *J Clin Endocrinol Metab*. 2011;96(7):1911–30.
40. Sanders KM, Stuart AL, Williamson EJ, Simpson JA, Kotowicz MA, Young D, et al. Annual High-Dose Oral Vitamin D and Falls and Fractures in Older Women. *JAMA*. 2010;303(18):1815.
41. Eleni A, Panagiotis P. A systematic review and meta-analysis of vitamin D and calcium in preventing osteoporotic fractures. Vol. 39, *Clinical Rheumatology*. Springer Science and Business Media Deutschland GmbH; 2020. p. 3571–9.
42. Yao P, Bennett D, Mafham M, Lin X, Chen Z, Armitage J, et al. Vitamin D and Calcium for the Prevention of Fracture: A Systematic Review and Meta-analysis. Vol. 2, *JAMA network open*. NLM (Medline); 2019. p. e1917789.

43. Zhao JG, Zeng XT, Wang J, Liu L. Association between calcium or Vitamin D supplementation and fracture incidence in community-dwelling older adults a systematic review and meta-analysis. Vol. 318, JAMA - Journal of the American Medical Association. American Medical Association; 2017. p. 2466–82.
44. Overman RA, Borse M, Gourlay ML. Salmon Calcitonin Use and Associated Cancer Risk. *Ann Pharmacother*. 2013;47(12):1675–84.
45. Knopp-Sihota JA, Newburn-Cook C V, Homik J, Cummings GG, Voaklander D. Calcitonin for treating acute and chronic pain of recent and remote osteoporotic vertebral compression fractures: a systematic review and meta-analysis. *Osteoporos Int*. 2011;23(1):17–38.
46. Xiao X, Xu Y, Wu Q. Thiazide diuretic usage and risk of fracture: a meta-analysis of cohort studies. *Osteoporos Int*. 2018;29(7):1515–24.
47. Cheng L, Zhang K, Zhang Z. Effectiveness of thiazides on serum and urinary calcium levels and bone mineral density in patients with osteoporosis: a systematic review and meta-analysis. *Drug Des Devel Ther*. 2018 Nov 14;12:3929–35.
48. Barrionuevo P, Kapoor E, Asi N, Alahdab F, Mohammed K, Benkhadra K, et al. Efficacy of pharmacological therapies for the prevention of fractures in postmenopausal women: A network meta-analysis. *J Clin Endocrinol Metab*. 2019;104(5):1623–30.
49. Anderson GL, Limacher M, Assaf AR, Bassford T, Beresford SA, Black H, et al. Effects of conjugated equine estrogen in postmenopausal women with hysterectomy: the Women's Health Initiative randomized controlled trial. *J Am Med Assoc*. 2004;291:1701–12.
50. Siris ES, Harris ST, Eastell R, Zanchetta JR, Goemaere S, Diez-Perez A, et al. Skeletal effects of raloxifene after 8 years: Results from the Continuing Outcomes Relevant to Evista (CORE) study. *J Bone Miner Res*. 2005 Sep;20(9):1514–24.
51. Ettinger B, Black DM, Mitlak BH, Knickerbocker RK, Nickelsen T, Genant HK. Reduction of vertebral fracture risk in postmenopausal women with osteoporosis treated with raloxifene. Results from a 3-year randomized clinical trial. *J Am Med Assoc*. 1999;282:637–45.
52. Cummings SR, Ettinger B, Delmas PD, Kenemans P, Stathopoulos V, Verweij P, et al. The effects of tibolone in older postmenopausal women. *N Engl J Med*. 2008 Aug 14;359(7):697–708.
53. Formoso G, Perrone E, Maltoni S, Balduzzi S, Wilkinson J, Basevi V, et al. Short-term and long-term effects of tibolone in postmenopausal women. Vol. 2016, Cochrane Database of Systematic Reviews. John Wiley and Sons Ltd; 2016.
54. Lambert MNT, Hu LM, Jeppesen PB. A systematic review and meta-analysis of the effects of isoflavone formulations against estrogen-deficient bone resorption in peri- and postmenopausal women. *Am J Clin Nutr*. 2017;ajcn151464.
55. Wells GA, Cranney A, Peterson J, Boucher M, Shea B, Robinson V, et al. Etidronate for the primary and secondary prevention of osteoporotic fractures in postmenopausal women. *Cochrane database Syst Rev*. 2008 Jan 23;2008(1):CD003376–CD003376.

56. Black DM, Thompson DE, Bauer DC, Ensrud K, Musliner T, Hochberg MC, et al. Fracture risk reduction with alendronate in women with osteoporosis: the fracture intervention trial. *J Clin Endocrinol Metab.* 2000;85:4118–24.
57. Wells GA, Cranney A, Peterson J, Boucher M, Shea B, Welch V, et al. Alendronate for the primary and secondary prevention of osteoporotic fractures in postmenopausal women. *Cochrane Database Syst Rev.* 2008 Jan; 2008(1): CD003376.
58. Bauer DC, Schwartz A, Palermo L, Cauley J, Hochberg M, Santora A, et al. Fracture prediction after discontinuation of 4 to 5 years of alendronate therapy: the FLEX study. *JAMA Intern Med.* 2014 Jul;174(7):1126–34.
59. Black DM, Schwartz A V, Ensrud KE, Cauley JA, Levis S, Quandt SA, et al. Effects of Continuing or Stopping Alendronate After 5 Years of Treatment. *JAMA.* 2006;296(24):2927.
60. Schwartz A V, Bauer DC, Cummings SR, Cauley JA, Ensrud KE, Palermo L, et al. Efficacy of continued alendronate for fractures in women with and without prevalent vertebral fracture: The FLEX Trial. *J Bone Miner Res.* 2010;25(5):976–82.
61. Ding L-L, Wen F, Wang H, Wang D-H, Liu Q, Mo Y-X, et al. Osteoporosis drugs for prevention of clinical fracture in white postmenopausal women: a network meta-analysis of survival data. *Osteoporos Int.* 2020;31(5):961–71.
62. Sing C-W, Wong AYS, Kiel DP, Cheung EYN, Lam JKY, Cheung TT, et al. Association of Alendronate and Risk of Cardiovascular Events in Patients With Hip Fracture. *J Bone Miner Res.* 2018;33(8):1422–34.
63. Harris ST, Watts NB, Genant HK, McKeever CD, Hangartner T, Kelelr M, et al. Effects of risedronate treatment on vertebral and nonvertebral fractures in women with postmenopausal osteoporosis. A randomized controlled trial. *J Am Med Assoc.* 1999;282:1344–52.
64. McClung MR, Baskie A, Burgio DE, Wenderoth D, Recker RR. Treatment of postmenopausal osteoporosis with delayed-release risedronate 35 mg weekly for 2 years. *Osteoporos Int.* 2012/10/19. 2013 Jan;24(1):301–10.
65. Delmas PD, Benhamou CL, Man Z, Tlustochowicz W, Matzkin E, Eusebio R, et al. Monthly dosing of 75 mg risedronate on 2 consecutive days a month: efficacy and safety results. *Osteoporos Int.* 2007;19(7):1039–45.
66. Black DM, Delmas PD, Eastell R, Reid IR, Boonen S, Cauley JA, et al. Once-Yearly Zoledronic Acid for Treatment of Postmenopausal Osteoporosis. *N Engl J Med.* 2007;356(18):1809–22.
67. Black DM, Reid IR, Cauley J, Boonen S, Cosman F, Leung P, et al. The effect of 3 versus 6 years of zoledronic acid treatment in osteoporosis: A randomized extension to the HORIZON-Pivotal Fracture Trial (PFT). *Bone.* 2011;48:S91.
68. Reid IR, Horne AM, Mihov B, Stewart A, Garratt E, Wong S, et al. Fracture Prevention with Zoledronate in Older Women with Osteopenia. *N Engl J Med.* 2018;379(25):2407–16.
69. Sanderson J, Martyn-St James M, Stevens J, Goka E, Wong R, Campbell F, et al. Clinical

- effectiveness of bisphosphonates for the prevention of fragility fractures: A systematic review and network meta-analysis. *Bone*. 2016;89:52–8.
70. Zhou J, Ma X, Wang T, Zhai S. Comparative efficacy of bisphosphonates in short-term fracture prevention for primary osteoporosis: a systematic review with network meta-analyses. *Osteoporos Int*. 2016;27(11):3289–300.
71. Wang G, Sui L, Gai P, Li G, Qi X, Jiang X. The efficacy and safety of vertebral fracture prevention therapies in post-menopausal osteoporosis treatment: Which therapies work best? a network meta-analysis. *Bone Joint Res*. 2017 Jul;6(7):452–63.
72. Panagiotakou A, Yavropoulou M, Nasiri-Ansari N, Makras P, Basdra EK, Papavassiliou AG, et al. Extra-skeletal effects of bisphosphonates. *Metabolism*. 2020 Sep 1;110:154264.
73. Lu L, Lu L, Zhang J, Li J. Potential risks of rare serious adverse effects related to long-term use of bisphosphonates: An overview of systematic reviews. Vol. 45, *Journal of Clinical Pharmacy and Therapeutics*. Blackwell Publishing Ltd; 2020. p. 45–51.
74. Rodríguez AJ, Ernst MT, Nybo M, Prieto-Alhambra D, Ebeling PR, Hermann AP, et al. Oral Bisphosphonate use Reduces Cardiovascular Events in a Cohort of Danish Patients Referred for Bone Mineral Density. *J Clin Endocrinol Metab*. 2020;105(10):3215–25.
75. Cummings SR, Lui L-Y, Eastell R, Allen IE. Association Between Drug Treatments for Patients With Osteoporosis and Overall Mortality Rates: A Meta-analysis. *JAMA Intern Med*. 2019 Aug 19;179(11):1491–500.
76. Li Y-Y, Gao L-J, Zhang Y-X, Liu S-J, Cheng S, Liu Y-P, et al. Bisphosphonates and risk of cancers: a systematic review and meta-analysis. *Br J Cancer*. 2020/09/09. 2020 Nov;123(10):1570–81.
77. Dömötör ZR, Vörhendi N, Hanák L, Hegyi P, Kiss S, Csiki E, et al. Oral Treatment With Bisphosphonates of Osteoporosis Does Not Increase the Risk of Severe Gastrointestinal Side Effects: A Meta-Analysis of Randomized Controlled Trials. *Front Endocrinol (Lausanne)*. 2020 Nov 10;11:573976.
78. Deng Y, Zhang Z, Jia X, Cheng W, Zhou X, Liu Y, et al. Oral bisphosphonates and incidence of cancers in patients with osteoporosis: a systematic review and meta-analysis. *Arch Osteoporos*. 2018;14(1).
79. Rizzoli R, Reginster J-Y, Boonen S, Bréart G, Diez-Perez A, Felsenberg D, et al. Adverse reactions and drug-drug interactions in the management of women with postmenopausal osteoporosis. *Calcif Tissue Int*. 2011/06/03. 2011 Aug;89(2):91–104.
80. Kim DH, Rogers JR, Fulchino LA, Kim CA, Solomon DH, Kim SC. Bisphosphonates and risk of cardiovascular events: a meta-analysis. *PLoS One*. 2015 Apr 17;10(4):e0122646–e0122646.
81. Pijnenburg L, Salem J-E, Lebrun-Vignes B, Sibilia J, Javier R-M, Arnaud L. Atrial fibrillation in patients treated with intravenous zoledronic or pamidronic acid: a pharmacoepidemiological study. *Eur J Endocrinol*. 2021 Jan 15;184(3).
82. Fuggle NR, Cooper C, Harvey NC, Al-Daghri N, Brandi ML, Bruyere O, et al. Assessment of Cardiovascular Safety of Anti-Osteoporosis Drugs. Vol. 80, *Drugs*. Adis;

2020. p. 1537–52.

83. Miller PD, Jamal SA, Evenepoel P, Eastell R, Boonen S. Renal safety in patients treated with bisphosphonates for osteoporosis: A review. *J Bone Miner Res*. 2013 Oct;28(10):2049–59.
84. Evenepoel P, Cunningham J, Ferrari S, Haarhaus M, Javaid MK, Lafage-Proust M-H, et al. European Consensus Statement on the diagnosis and management of osteoporosis in chronic kidney disease stages G4–G5D. *Nephrol Dial Transplant*. 2020;36(1):42–59.
85. Khan AA, Morrison A, Hanley DA, Felsenberg D, McCauley LK, O’Ryan F, et al. Diagnosis and management of osteonecrosis of the jaw: a systematic review and international consensus. *J Bone Miner Res*. 2015;30(1):3–23.
86. López-Delgado L, Riancho-Zarrabeitia L, Riancho JAJA, Lopez-Delgado L, Riancho-Zarrabeitia L, Riancho JAJA. Genetic and acquired factors influencing the effectiveness and toxicity of drug therapy in osteoporosis. *Expert Metab Toxicol*. 2016;12(4):389–98.
87. Ebeling PR, Akesson K, Bauer DC, Buchbinder R, Eastell R, Fink HA, et al. The Efficacy and Safety of Vertebral Augmentation: A Second ASBMR Task Force Report. *J Bone Miner Res*. 2019;34(1):3–21.
88. Black DM, Abrahamsen B, Bouxsein ML, Einhorn T, Napoli N. Atypical Femur Fractures – Review of epidemiology, relationship to bisphosphonates, prevention and clinical management. *Endocr Rev*. 2018 Aug 29;
89. Black DM, Geiger EJ, Eastell R, Vittinghoff E, Li BH, Ryan DS, et al. Atypical Femur Fracture Risk versus Fragility Fracture Prevention with Bisphosphonates. *N Engl J Med*. 2020 Aug 20;383(8):743–53.
90. Keren S, Leibovitch I, Ben Cnaan R, Neudorfer M, Fogel O, Greenman Y, et al. Aminobisphosphonate-associated orbital and ocular inflammatory disease. *Acta Ophthalmol*. 2019 Aug 1;97(5):e792–9.
91. Jackson C, Freeman ALJ, Szlamka Z, Spiegelhalter DJ. The adverse effects of bisphosphonates in breast cancer: A systematic review and network meta-analysis. *PLoS One*. 2021 Feb 5;16(2):e0246441–e0246441.
92. Cummings SR, San Martin J, McClung MR, Siris ES, Eastell R, Reid IR, et al. Denosumab for prevention of fractures in postmenopausal women with osteoporosis. *N Engl J Med*. 2009;361(8):756–65.
93. Boonen S, Adachi JD, Man Z, Cummings SR, Lippuner K, Törring O, et al. Treatment with Denosumab Reduces the Incidence of New Vertebral and Hip Fractures in Postmenopausal Women at High Risk. *J Clin Endocrinol Metab*. 2011;96(6):1727–36.
94. Bone HG, Wagman RB, Brandi ML, Brown JP, Chapurlat R, Cummings SR, et al. 10 years of denosumab treatment in postmenopausal women with osteoporosis: results from the phase 3 randomised FREEDOM trial and open-label extension. *Lancet Diabetes Endocrinol*. 2017;5(7):513–23.
95. Cummings SR, Ferrari S, Eastell R, Gilchrist N, Jensen JEB, McClung M, et al. Vertebral Fractures After Discontinuation of Denosumab: A Post Hoc Analysis of the Randomized Placebo-Controlled FREEDOM Trial and Its Extension. *J Bone Miner Res*. 2018 Feb

1;33:190–8.

96. Seeto AH, Abrahamsen B, Ebeling PR, Rodríguez AJ. Cardiovascular Safety of Denosumab Across Multiple Indications: A Systematic Review and Meta-Analysis of Randomized Trials. *J Bone Miner Res.* 2020;36(1):24–40.
97. Meunier PJ, Roux C, Seeman E, Ortolani S, Badurski JE, Spector TD, et al. The Effects of Strontium Ranelate on the Risk of Vertebral Fracture in Women with Postmenopausal Osteoporosis. *N Engl J Med.* 2004;350(5):459–68.
98. Neer RMN, Arnaud CD, Zanchetta JR, Prince R, Gaich GA, Reginster JYI, et al. Effect of parathyroid hormone (1-34) on fractures and bone mineral density in postmenopausal women with osteoporosis. *N Engl J Med.* 2001;344(19):1434–41.
99. Langdahl BL, Silverman S, Fujiwara S, Saag K, Napoli N, Soen S, et al. Real-world effectiveness of teriparatide on fracture reduction in patients with osteoporosis and comorbidities or risk factors for fractures: Integrated analysis of 4 prospective observational studies. *Bone.* 2018;116:58–66.
100. Díez-Pérez A, Marin F, Eriksen EF, Kendler DL, Krege JH, Delgado-Rodríguez M. Effects of teriparatide on hip and upper limb fractures in patients with osteoporosis: A systematic review and meta-analysis. *Bone.* 2019;120(September 2018):1–8.
101. Simpson EL, Martyn-St James M, Hamilton J, Wong R, Gittoes N, Selby P, et al. Clinical effectiveness of denosumab, raloxifene, romosozumab, and teriparatide for the prevention of osteoporotic fragility fractures: A systematic review and network meta-analysis. *Bone.* 2020;130(September 2019):115081.
102. Geusens P, Marin F, Kendler DL, Russo LA, Zerbini CAF, Minisola S, et al. Effects of Teriparatide Compared with Risedronate on the Risk of Fractures in Subgroups of Postmenopausal Women with Severe Osteoporosis: The VERO Trial. *J Bone Miner Res.* 2018;33(5):783–94.
103. Miller PD, Hattersley G, Riis BJ, Williams GC, Lau E, Russo LA, et al. Effect of abaloparatide vs placebo on new vertebral fractures in postmenopausal women with osteoporosis a randomized clinical trial. *JAMA - J Am Med Assoc.* 2016;316(7):722–33.
104. Reginster J-Y, Bianic F, Campbell R, Martin M, Williams SA, Fitzpatrick LA. Abaloparatide for risk reduction of nonvertebral and vertebral fractures in postmenopausal women with osteoporosis: a network meta-analysis. *Osteoporos Int.* 2019/04/06. 2019 Jul;30(7):1465–73.
105. McClung MR, Grauer A, Boonen S, Bolognese MA, Brown JP, Diez-Perez A, et al. Romosozumab in postmenopausal women with low bone mineral density. *N Engl J Med.* 2014;370(5):412–20.
106. Cosman F, Crittenden DB, Ferrari S, Khan A, Lane NE, Lippuner K, et al. FRAME Study: The Foundation Effect of Building Bone With 1 Year of Romosozumab Leads to Continued Lower Fracture Risk After Transition to Denosumab. *J Bone Miner Res.* 2018;33(7):1219–26.
107. Saag KG, Petersen J, Brandi ML, Karaplis AC, Lorentzon M, Thomas T, et al. Romosozumab or Alendronate for Fracture Prevention in Women with Osteoporosis. *N*

- Engl J Med. 2017;377(15):1417–27.
108. Kaveh S, Hosseini-fard H, Ghadimi N, Vojdani-an M, Aryankhesal A. Efficacy and safety of Romosozumab in treatment for low bone mineral density: a systematic review and meta-analysis. *Clin Rheumatol*. 2020;39(11):3261–76.
109. Michael Lewiecki E, Blicharski T, Goemaere S, Lippuner K, Meisner PD, Miller PD, et al. A Phase III Randomized Placebo-Controlled Trial to Evaluate Efficacy and Safety of Romosozumab in Men With Osteoporosis. *J Clin Endocrinol Metab*. 2018;103(9):3183–93.
110. Lv F, Cai X, Yang W, Gao L, Chen L, Wu J, et al. Denosumab or romosozumab therapy and risk of cardiovascular events in patients with primary osteoporosis: Systematic review and meta- analysis. *Bone*. 2020;130(August 2019):115121.
111. Clark W, Bird P, Gonski P, Diamond TH, Smerdely P, McNeil HP, et al. Safety and efficacy of vertebroplasty for acute painful osteoporotic fractures (VAPOUR): a multicentre, randomised, double-blind, placebo-controlled trial. *Lancet*. 2016;388(10052):1408–16.
112. Firanesco CE, De Vries J, Lodder P, Venmans A, Schoemaker MC, Smeet AJ, et al. Vertebroplasty versus sham procedure for painful acute osteoporotic vertebral compression fractures (VERTOS IV): Randomised sham controlled clinical trial. *BMJ*. 2018;361.
113. Buchbinder R, Osborne RH, Ebeling PR, Wark JD, Mitchell P, Wriedt C, et al. A randomized trial of vertebroplasty for painful osteoporotic vertebral fractures. *N Engl J Med*. 2009 Jun;361:557–68.
114. Kallmes DF, Comstock BA, Heagerty PJ, Turner JA, Wilson DJ, Diamond TH, et al. A randomized trial of vertebroplasty for osteoporotic spinal fractures. *N Engl J Med*. 2009 Jun;361(6):569–79.
115. Lou S, Shi & X, Zhang & X, Lyu & H, Li & Z, Wang Y, et al. Percutaneous vertebroplasty versus non-operative treatment for osteoporotic vertebral compression fractures: a meta-analysis of randomized controlled trials. *Osteoporos Int*. 2019 Dec 1;30(12):2369–80.
116. Zhu Y, Cheng J, Yin J, Zhang Z, Liu C, Hao D. Therapeutic effect of kyphoplasty and balloon vertebroplasty on osteoporotic vertebral compression fracture: A systematic review and meta-analysis of randomized controlled trials. *Medicine (Baltimore)*. 2019 Nov;98(45):e17810–e17810.
117. Diez-Perez A, Adachi JD, Agnusdei D, Bilezikian JP, Compston JE, Cummings SR, et al. Treatment failure in osteoporosis. *Osteoporos Int*. 2012;23(0937–941; 12):2769–74.
118. Kamimura M, Nakamura Y, Ikegami S, Uchiyama S, Kato H, Taguchi A. Significant improvement of bone mineral density and bone turnover markers by denosumab therapy in bisphosphonate-unresponsive patients. *Osteoporos Int*. 2016/09/20. 2017 Feb;28(2):559–66.
119. Nogués X, Nolla JM, Casado E, Jódar E, Muñoz-Torres M, Quesada-Gómez JM, et al. Spanish consensus on treat to target for osteoporosis. *Osteoporos Int*. 2017/11/24. 2018

Feb;29(2):489–99.

120. Thomas T, Casado E, Geusens P, Lems WF, Timoshanko J, Taylor D, et al. Is a treat-to-target strategy in osteoporosis applicable in clinical practice? Consensus among a panel of European experts. *Osteoporos Int*. 2020/08/07. 2020 Dec;31(12):2303–11.
121. Ferrari S, Libanati C, Lin CJF, Brown JP, Cosman F, Czerwiński E, et al. Relationship Between Bone Mineral Density T-Score and Nonvertebral Fracture Risk Over 10 Years of Denosumab Treatment. *J Bone Miner Res*. 2019/05/29. 2019 Jun 1;34(6):1033–40.
122. Compston J, Cooper A, Cooper C, Gittoes N, Gregson C, Harvey N, et al. UK clinical guideline for the prevention and treatment of osteoporosis. *Arch Osteoporos*. 2017/04/19. 2017 Dec;12(1):43.
123. Eastell R, Rosen CJ, Black DM, Cheung AM, Murad MH, Shoback D. Pharmacological Management of Osteoporosis in Postmenopausal Women: An Endocrine Society\* Clinical Practice Guideline. *J Clin Endocrinol Metab*. 2019;104(5):1595–622.
124. Conley RB, Adib G, Adler RA, Åkesson KE, Alexander IM, Amenta KC, et al. Secondary Fracture Prevention: Consensus Clinical Recommendations from a Multistakeholder Coalition. *J Bone Miner Res*. 2019;35(1):36–52.
125. Camacho PM, Petak SM, Binkley N, Diab DL, Eldeiry LS, Farooki A, et al. American Association of Clinical Endocrinologists/American College of Endocrinology Clinical Practice Guidelines for the Diagnosis and Treatment of Postmenopausal Osteoporosis—2020 Update. *Endocr Pract*. 2020;26:1–46.
126. Moro Álvarez MJ, Neyro JL, Castañeda S. Therapeutic holidays in osteoporosis: Long-term strategy of treatment with bisphosphonates. *Med Clínica (English Ed)*. 2016 Jan 1;146(1):24–9.
127. Sølling AS, Harsløf T, Langdahl B. Treatment with Zoledronate Subsequent to Denosumab in Osteoporosis: a Randomized Trial. *J Bone Miner Res*. 2020;35(10):1858–70.
128. Leder BZ, Tsai JN, Uihlein A V, Wallace PM, Lee H, Neer RM, et al. Denosumab and teriparatide transitions in postmenopausal osteoporosis (the DATA-Switch study): extension of a randomised controlled trial. *Lancet (London, England)*. 2015/07/02. 2015 Sep 19;386:1147–55.
129. Leder BZ, Neer RM, Wyland JJ, Lee HW, Burnett-Bowie S-AM, Finkelstein JS. Effects of teriparatide treatment and discontinuation in postmenopausal women and eugonadal men with osteoporosis. *J Clin Endocrinol Metab*. 2009/05/12. 2009 Aug;94(8):2915–21.
130. Guañabens N, Moro-Álvarez MJ, Casado E, Blanch-Rubió J, Gómez-Alonso C, Díaz-Guerra GM, et al. The next step after anti-osteoporotic drug discontinuation: an up-to-date review of sequential treatment. *Endocrine*. 2019;64(3):441–55.
131. Cosman F, Crittenden DB, Adachi JD, Binkley N, Czerwinski E, Ferrari S, et al. Romosozumab Treatment in Postmenopausal Women with Osteoporosis. *N Engl J Med*. 2016;375(16):1532–43.
132. Lewiecki EM, Dinavahi R V., Lazaretti-Castro M, Ebeling PR, Adachi JD, Miyauchi A, et al. One Year of Romosozumab Followed by Two Years of Denosumab Maintains



- Fracture Risk Reductions: Results of the FRAME Extension Study. *J Bone Miner Res.* 2018;34(3):419–28.
133. Boonen S, Marin F, Obermayer-Pietsch B, Simões ME, Barker C, Glass E V, et al. Effects of Previous Antiresorptive Therapy on the Bone Mineral Density Response to Two Years of Teriparatide Treatment in Postmenopausal Women with Osteoporosis. *J Clin Endocrinol Metab.* 2008;93(3):852–60.
  134. Cosman F, Keaveny TM, Kopperdahl D, Wermers RA, Wan X, Krohn KD, et al. Hip and spine strength effects of adding versus switching to teriparatide in postmenopausal women with osteoporosis treated with prior alendronate or raloxifene. *J Bone Miner Res.* 2013;28(6):1328–36.
  135. Kendler DL, Marin F, Zerbini CAF, Russo LA, Greenspan SL, Zikan V, et al. Effects of teriparatide and risedronate on new fractures in post-menopausal women with severe osteoporosis (VERO): a multicentre, double-blind, double-dummy, randomised controlled trial. *Lancet.* 2018;391(10117):230–40.
  136. Langdahl BL, Libanati C, Crittenden DB, Bolognese MA, Brown JP, Daizadeh NS, et al. Romosozumab (sclerostin monoclonal antibody) versus teriparatide in postmenopausal women with osteoporosis transitioning from oral bisphosphonate therapy: a randomised, open-label, phase 3 trial. *Lancet.* 2017;390(10102):1585–94.
  137. Bone HG, Greenspan SL, McKeever c., Bell N, Davidson M, Downs RW, et al. Alendronate and estrogen effects in postmenopausal women with low bone mineral density. *J Clin Endocrinol Metab.* 2000;85:720–6.
  138. Cosman F, Eriksen EF, Recknor C, Miller PD, Guañabens N, Kasperk C, et al. Effects of intravenous zoledronic acid plus subcutaneous teriparatide [rhPTH(1-34)] in postmenopausal osteoporosis. *J Bone Miner Res.* 2011;26(3):503–11.
  139. Leder BZ, Tsai JN, Uihlein A V, Burnett-Bowie S-AM, Zhu Y, Foley K, et al. Two years of Denosumab and teriparatide administration in postmenopausal women with osteoporosis (The DATA Extension Study): a randomized controlled trial. *J Clin Endocrinol Metab.* 2014/02/11. 2014 May;99(5):1694–700.
  140. Ringe JD, Farahmand P, Faber H, Dorst A. Sustained efficacy of risedronate in men with primary and secondary osteoporosis: results of a 2-year study. *Rheumatol Int.* 2008;29(3):311–5.
  141. Ringe JD, Dorst A, Faber H, Ibach K. Alendronate treatment of established primary osteoporosis in men: 3-year results of a prospective, comparative, two-arm study. *Rheumatol Int.* 2004;24(2):110–3.
  142. Orwoll ES, Ettinger M, Weiss S, Miller P, Kendler D, Graham J, et al. Alendronate for the treatment of osteoporosis in men. *N Engl J Med.* 2000;343(9):604–10.
  143. Boonen S, Reginster J-Y, Kaufman J-M. EFFECT OF ZOLEDRONIC ACID THERAPY ON FRACTURE RISK IN THE TREATMENT OF MEN WITH OSTEOPOROSIS. *Osteoporos Bone Dis.* 2012;15(3):40.
  144. Orwoll ES, Miller PD, Adachi JD, Brown J, Adler RA, Kendler D, et al. Efficacy and safety of a once-yearly i.v. Infusion of zoledronic acid 5 mg versus a once-weekly 70-mg

- oral alendronate in the treatment of male osteoporosis: A randomized, multicenter, double-blind, active-controlled study. *J Bone Miner Res.* 2010;25(10):2239–50.
145. Smith MR, Egerdie B, Toriz NH, Feldman R, Tammela TLJ, Saad F, et al. Denosumab in Men Receiving Androgen-Deprivation Therapy for Prostate Cancer. *N Engl J Med.* 2009 Aug 20;361:745–55.
146. Orwoll E, Teglbjærg CS, Langdahl BL, Chapurlat R, Czerwinski E, Kendler DL, et al. A Randomized, Placebo-Controlled Study of the Effects of Denosumab for the Treatment of Men with Low Bone Mineral Density. *J Clin Endocrinol Metab.* 2012;97(9):3161–9.
147. Orwoll ES, Scheele WH, Paul S, Adami S, Syversen U, Diez-Perez A, et al. The Effect of Teriparatide [Human Parathyroid Hormone (1-34)] Therapy on Bone Density in Men With Osteoporosis. *J Bone Miner Res.* 2003;18(1):9–17.
148. Kaufman J-M, Orwoll E, Goemaere S, San Martin J, Hossain A, Dalsky GP, et al. Teriparatide effects on vertebral fractures and bone mineral density in men with osteoporosis: treatment and discontinuation of therapy. *Osteoporos Int.* 2004;16(5):510–6.
149. Adachi JD, Saag KG, Delmas PD, Liberman UA, Emkey RD, Seeman E, et al. Two-year effects of alendronate on bone mineral density and vertebral fracture in patients receiving glucocorticoids: a randomized, double-blind, placebo-controlled extension trial. *Arthritis Rheum.* 2001;44(1):202–11.
150. Reid DM, Hughes RA, Laan RFJM, Sacco-Gibson NA, Wenderoth DH, Adami S, et al. Efficacy and safety of daily risedronate in the treatment of corticosteroid-induced osteoporosis in men and women: a randomized trial. European Corticosteroid-Induced Osteoporosis Treatment Study. *J Bone Miner Res.* 2000;15(6):1006–13.
151. Reid DM, Devogelaer J-P, Saag K, Roux C, Lau C-S, Reginster J-Y, et al. Zoledronic acid and risedronate in the prevention and treatment of glucocorticoid-induced osteoporosis (HORIZON): a multicentre, double-blind, double-dummy, randomised controlled trial. *Lancet.* 2009;373(9671):1253–63.
152. Saag KG, Zanchetta JR, Devogelaer J-PP, Adler RA, Eastell R, See K, et al. Effects of teriparatide versus alendronate for treating glucocorticoid-induced osteoporosis: Thirty-six-month results of a randomized, double-blind, controlled trial. *Arthritis Rheum.* 2009;60(11):3346–55.
153. Glüer CC, Marin F, Ringe JD, Hawkins F, Möricke R, Papaioannu N, et al. Comparative effects of teriparatide and risedronate in glucocorticoid-induced osteoporosis in men: 18-month results of the EuroGIOPs trial. *J Bone Miner Res.* 2013;28(6):1355–68.
154. Richy F, Ethgen O, Bruyere O, Reginster J-Y. Efficacy of alphacalcidol and calcitriol in primary and corticosteroid-induced osteoporosis: a meta-analysis of their effects on bone mineral density and fracture rate. *Osteoporos Int.* 2004;15(4):301–10.
155. Yanbei ZA, Hansen KE. Denosumab in the treatment of glucocorticoid-induced osteoporosis: a systematic review and meta-analysis. *Drug Des Devel Ther.* 2019 Aug 14;13:2843–52.
156. Wu J, Zhang Q, Yan G, Jin X. Denosumab compared to bisphosphonates to treat

- postmenopausal osteoporosis: a meta-analysis. *J Orthop Surg Res*. 2018 Aug 2;13(1):194.
157. Saag KG, Pannacciulli N, Geusens P, Adachi JD, Messina OD, Morales-Torres J, et al. Denosumab Versus Risedronate in Glucocorticoid-Induced Osteoporosis: Final Results of a Twenty-Four-Month Randomized, Double-Blind, Double-Dummy Trial. *Arthritis Rheumatol* (Hoboken, NJ). 2019/05/25. 2019 Jul;71(7):1174–84.
  158. Florez H, Ramírez J, Monegal A, Guañabens N, Peris P. Spontaneous vertebral fractures after denosumab discontinuation: A case collection and review of the literature. *Semin Arthritis Rheum*. 2019;49(2):197–203.
